# Supplementary material
Source: PubMed Central journal article supplement (PMC2763633)
Supplement: NIHMS108584-supplement-Suppl__Table_1.pdf [file NIHMS108584-supplement-Suppl__Table_1.pdf]

**Trypanosoma cruzi-specific proteins**

**Accession number - protein description**

- 1 gi|70877437|gb|EAN90780.1| P-type H+-ATPase, putative [Trypanosoma cruzi]
- 2 gi|70883901|gb|EAN96787.1| ABC transporter, putative [Trypanosoma cruzi]
- 3 gi|35181448|gb|AAO74600.1| serine carboxypeptidase precursor [Trypanosoma cruzi]
- 4 gi|10119900|gb|AAG12986.1|AF079585\_2 pyruvate phosphate dikinase 2 [Trypanosoma cruzi]
- 5 gi|70886439|gb|EAN99221.1| hypothetical protein, conserved [Trypanosoma cruzi]
- 6 gi|4322302|gb|AAD16005.1| lysosomal acid alpha-mannosidase precursor [Trypanosoma cruzi]
- 7 gi|70880382|gb|EAN93482.1| hypothetical protein Tc00.1047053509683.10 [Trypanosoma cruzi]
- 8 gi|70883049|gb|EAN95983.1| ATPase beta subunit, putative [Trypanosoma cruzi]
- 9 gi|70884053|gb|EAN96932.1| hypothetical protein, conserved [Trypanosoma cruzi]
- 10 gi|3004632|gb|AAC09044.1| P-glycoprotein [Trypanosoma cruzi]
- 11 gi|70877565|gb|EAN90896.1| hypothetical protein, conserved [Trypanosoma cruzi]
- 12 gi|70881221|gb|EAN94265.1| hypothetical protein, conserved [Trypanosoma cruzi]
- 13 gi|70876682|gb|EAN90106.1| cysteine proteinase, putative [Trypanosoma cruzi]
- 14 gi|17942709|pdb|1ll2|B Chain B, Crystal Structure Of Phosphoenolpyruvate Carboxykinase (Pepck) From Trypanosoma Cruzi
- 15 gi|3080753|gb|AAC14692.1| glutamate dehydrogenase [Trypanosoma cruzi]
- 16 gi|70884812|gb|EAN97657.1| chaperonin HSP60, mitochondrial precursor [Trypanosoma cruzi]
- 17 gi|70878673|gb|EAN91907.1| ATP-dependent RNA helicase, putative [Trypanosoma cruzi]
- 18 gi|18568141|gb|AAL75957.1|AF455117\_1 beta tubulin 2.3 [Trypanosoma cruzi]
- 19 gi|70866356|gb|EAN81944.1| lysosomal/endosomal membrane protein p67, putative [Trypanosoma cruzi]
- 20 gi|70880439|gb|EAN93537.1| hypothetical protein, conserved [Trypanosoma cruzi]
- 21 gi|3088522|gb|AAD03404.1| cathepsin B-like protease precursor [Trypanosoma cruzi]
- 22 gi|70884449|gb|EAN97308.1| hypothetical protein, conserved [Trypanosoma cruzi]
- 23 gi|61207332|gb|AAx40391.1| elongation factor 1-alpha [Trypanosoma cruzi]
- 24 gi|19401140|gb|AAL87542.1|AF254412\_2 proton motive P-type ATPase 2 [Trypanosoma cruzi]
- 25 gi|3063552|gb|AAC14088.1| TcC31.34 [Trypanosoma cruzi]
- 26 gi|70886269|gb|EAN99055.1| hypothetical protein, conserved [Trypanosoma cruzi]
- 27 gi|70876109|gb|EAN89593.1| hypothetical protein Tc00.1047053511439.40 [Trypanosoma cruzi]
- 28 gi|70865128|gb|EAN81418.1| sterol 24-c-methyltransferase, putative [Trypanosoma cruzi]
- 29 gi|70883137|gb|EAN96065.1| Golgi/lysosome glycoprotein, putative [Trypanosoma cruzi]
- 30 gi|70871581|gb|EAN85703.1| hypothetical protein, conserved [Trypanosoma cruzi]
- 31 gi|70882340|gb|EAN95315.1| hypothetical protein, conserved [Trypanosoma cruzi]
- 32 gi|70881020|gb|EAN94076.1| histone H4, putative [Trypanosoma cruzi]
- 33 gi|70875516|gb|EAN89062.1| hypothetical protein, conserved [Trypanosoma cruzi]
- 34 gi|70885584|gb|EAN98396.1| hypothetical protein, conserved [Trypanosoma cruzi]
- 35 gi|33563100|gb|AAP45630.1| S-adenosylhomocysteine hydrolase [Trypanosoma cruzi]
- 36 gi|70879878|gb|EAN93017.1| vacuolar-type proton translocating pyrophosphatase 1, putative [Trypanosoma cruzi]
- 37 gi|70883145|gb|EAN96072.1| hypothetical protein, conserved [Trypanosoma cruzi]
- 38 gi|70881521|gb|EAN94545.1| hypothetical protein, conserved [Trypanosoma cruzi]
- 39 gi|70883533|gb|EAN96440.1| hypothetical protein, conserved [Trypanosoma cruzi]
- 40 gi|70874608|gb|EAN88271.1| hypothetical protein, conserved [Trypanosoma cruzi]
- 41 gi|70868885|gb|EAN83616.1| hypothetical protein, conserved [Trypanosoma cruzi]
- 42 gi|70876688|gb|EAN90112.1| hypothetical protein Tc00.1047053508317.70 [Trypanosoma cruzi]
- 43 gi|70885676|gb|EAN98485.1| histidine ammonia-lyase, putative [Trypanosoma cruzi]
- 44 gi|70886432|gb|EAN99214.1| hypothetical protein, conserved [Trypanosoma cruzi]
- 45 gi|18568136|gb|AAL75955.1|AF455115\_1 alpha tubulin [Trypanosoma cruzi]
- 46 gi|10626|emb|CAA47952.1| Heat shock protein 70 [Trypanosoma cruzi]
- 47 gi|763030|emb|CAA47951.1| glucose-regulated protein 78 [Trypanosoma cruzi]
- 48 gi|70886287|gb|EAN99073.1| heat shock protein, putative [Trypanosoma cruzi]
- 49 gi|70886069|gb|EAN98862.1| hypothetical protein, conserved [Trypanosoma cruzi]
- 50 gi|1552212|dbj|BAA13411.1| calcium-binding protein [Trypanosoma cruzi]
- 51 gi|70879588|gb|EAN92748.1| UDP-Gal or UDP-GlcNAc-dependent glycosyltransferase, putative [Trypanosoma cruzi]
- 52 gi|70878227|gb|EAN91501.1| hypothetical protein, conserved [Trypanosoma cruzi]
- 53 gi|70879734|gb|EAN92885.1| membrane-bound acid phosphatase, putative [Trypanosoma cruzi]
- 54 gi|70881042|gb|EAN94097.1| hypothetical protein, conserved [Trypanosoma cruzi]
- 55 gi|3860075|gb|AAC72969.1| lysosomal alpha mannosidase [Trypanosoma cruzi]
- 56 gi|70881937|gb|EAN94935.1| ABC transporter, putative [Trypanosoma cruzi]
- 57 gi|70876981|gb|EAN90373.1| hypothetical protein, conserved [Trypanosoma cruzi]
- 58 gi|70882458|gb|EAN95427.1| hypothetical protein, conserved [Trypanosoma cruzi]

- 59 gi|6137419|pdb|1BW0|B Chain B, Crystal Structure Of Tyrosine Aminotransferase From Trypanosoma Cruzi
- 60 gi|70869901|gb|EAN84370.1| heat shock 70 kDa protein, mitochondrial precursor, putative [Trypanosoma cruzi]
- 61 gi|70881032|gb|EAN94087.1| hypothetical protein Tc00.1047053509791.80 [Trypanosoma cruzi]
- 62 gi|162048|gb|AAA30181.1| cruzain [Trypanosoma cruzi]
- 63 gi|70883852|gb|EAN96741.1| serine carboxypeptidase S28, putative [Trypanosoma cruzi]
- 64 gi|70882417|gb|EAN95388.1| hypothetical protein, conserved [Trypanosoma cruzi]
- 65 gi|70883510|gb|EAN96418.1| cysteine protease, putative [Trypanosoma cruzi]
- 66 gi|70887248|gb|EAO00008.1| hypothetical protein, conserved [Trypanosoma cruzi]
- 67 gi|58176956|pdb|1UUL|J Chain J, Tryparedoxin Peroxidase (Txnpx) From Trypanosoma Cruzi In The Reduced State
- 68 gi|70883914|gb|EAN96800.1| lipophosphoglycan biosynthetic protein, putative [Trypanosoma cruzi]
- 69 gi|70885719|gb|EAN98527.1| eukaryotic initiation factor 4a, putative [Trypanosoma cruzi]
- 70 gi|70881823|gb|EAN94828.1| protein tyrosine phosphatase-like protein, putative [Trypanosoma cruzi]
- 71 gi|93279691|pdb|2FO8|A Chain A, Solution Structure Of The Trypanosoma Cruzi Cysteine Protease Inhibitor Chagasin
- 72 gi|21730417|pdb|1K3T|D Chain D, Structure Of Glycosomal Glyceraldehyde-3-Phosphate Dehydrogenase From Trypanosoma Cruzi Complexed With Chalepin, A Coumarin Derivative Inhibitor
- 73 gi|16797822|gb|AAL29187.1|AF204399\_1 serine-arginine rich protein 1 [Trypanosoma cruzi]
- 74 gi|19424458|gb|AAL88741.1|AC104504\_10 Tcc2i18.10 [Trypanosoma cruzi]
- 75 gi|70880602|gb|EAN93689.1| hypothetical protein, conserved [Trypanosoma cruzi]
- 76 gi|70883016|gb|EAN95952.1| hypothetical protein, conserved [Trypanosoma cruzi]
- 77 gi|70886550|gb|EAN99327.1| hypothetical protein, conserved [Trypanosoma cruzi]
- 78 gi|70874449|gb|EAN88133.1| hypothetical protein, conserved [Trypanosoma cruzi]
- 79 gi|70880178|gb|EAN93294.1| multidrug resistance protein E, putative [Trypanosoma cruzi]
- 80 gi|70881707|gb|EAN94718.1| cysteine peptidase C (CPC), putative [Trypanosoma cruzi]
- 81 gi|70875605|gb|EAN89140.1| hypothetical protein, conserved [Trypanosoma cruzi]
- 82 gi|70880838|gb|EAN93909.1| hypothetical protein, conserved [Trypanosoma cruzi]
- 83 gi|70882982|gb|EAN95920.1| serine carboxypeptidase (CBP1), putative [Trypanosoma cruzi]
- 84 gi|70884391|gb|EAN97253.1| malate dehydrogenase, putative [Trypanosoma cruzi]
- 85 gi|61207328|gb|AAx40389.1| elongation factor 1-alpha [Trypanosoma cruzi]
- 86 gi|70884356|gb|EAN97220.1| cytochrome b5, putative [Trypanosoma cruzi]
- 87 gi|70881318|gb|EAN94356.1| chloride channel protein, putative [Trypanosoma cruzi]
- 88 gi|70886318|gb|EAN99103.1| hypothetical protein, conserved [Trypanosoma cruzi]
- 89 gi|70878165|gb|EAN91443.1| folate/pteridine transporter, putative [Trypanosoma cruzi]
- 90 gi|70870090|gb|EAN84514.1| calpain-like cysteine peptidase, putative [Trypanosoma cruzi]
- 91 gi|70872224|gb|EAN86242.1| calmodulin [Trypanosoma cruzi]
- 92 gi|70866667|gb|EAN82110.1| hypothetical protein Tc00.1047053426897.10 [Trypanosoma cruzi]
- 93 gi|70885620|gb|EAN98431.1| hypothetical protein Tc00.1047053508277.220 [Trypanosoma cruzi]
- 94 gi|70879396|gb|EAN92575.1| glutathione peroxidase-like protein, putative [Trypanosoma cruzi]
- 95 gi|70879327|gb|EAN92511.1| prostaglandin F synthase, putative [Trypanosoma cruzi]
- 96 gi|70872491|gb|EAN86462.1| aspartate aminotransferase, mitochondrial, putative [Trypanosoma cruzi]
- 97 gi|70880498|gb|EAN93592.1| serine carboxypeptidase S28, putative [Trypanosoma cruzi]
- 98 gi|70882980|gb|EAN95918.1| serine carboxypeptidase (CBP1), putative [Trypanosoma cruzi]
- 99 gi|2981039|gb|AAC06213.1| putative glutamate dehydrogenase [Trypanosoma cruzi]
- 100 gi|70885386|gb|EAN98207.1| protein kinase, putative [Trypanosoma cruzi]
- 101 gi|70878726|gb|EAN91956.1| aldehyde dehydrogenase, putative [Trypanosoma cruzi]
- 102 gi|1552210|dbj|BAA13410.1| heat shock protein 70 [Trypanosoma cruzi]
- 103 gi|70879737|gb|EAN92888.1| acyl-CoA dehydrogenase, putative [Trypanosoma cruzi]
- 104 gi|1854571|emb|CAA72132.1| dihydrolipoamide dehydrogenase [Trypanosoma cruzi]
- 105 gi|70877640|gb|EAN90963.1| hypothetical protein, conserved [Trypanosoma cruzi]
- 106 gi|70874727|gb|EAN88376.1| hypothetical protein, conserved [Trypanosoma cruzi]
- 107 gi|4539689|gb|AAD22175.1|AF107115\_1 calreticulin [Trypanosoma cruzi]
- 108 gi|70877922|gb|EAN91221.1| hypothetical protein, conserved [Trypanosoma cruzi]
- 109 gi|70877653|gb|EAN90976.1| histone H4, putative [Trypanosoma cruzi]
- 110 gi|70884760|gb|EAN97607.1| ADP,ATP carrier protein 1, mitochondrial precursor, putative [Trypanosoma cruzi]
- 111 gi|70886353|gb|EAN99137.1| cystathionine beta-synthase [Trypanosoma cruzi]
- 112 gi|70877369|gb|EAN90722.1| hypothetical protein, conserved [Trypanosoma cruzi]
- 113 gi|70873696|gb|EAN87480.1| UDP-Gal or UDP-GlcNAc-dependent glycosyltransferase, putative [Trypanosoma cruzi]
- 114 gi|70879904|gb|EAN93041.1| heat shock protein 85, putative [Trypanosoma cruzi]
- 115 gi|70883196|gb|EAN96121.1| RNA-binding protein, putative [Trypanosoma cruzi]
- 116 gi|70887453|gb|EAO00209.1| serine/threonine protein kinase, putative [Trypanosoma cruzi]
- 117 gi|70878497|gb|EAN91748.1| hypothetical protein, conserved [Trypanosoma cruzi]
- 118 gi|70868776|gb|EAN83534.1| histone H2B, putative [Trypanosoma cruzi]

- 119 gi|70878249|gb|EAN91522.1| folate/pteridine transporter, putative [Trypanosoma cruzi]
- 120 gi|70881841|gb|EAN94845.1| calpain cysteine peptidase, putative [Trypanosoma cruzi]
- 121 gi|70885186|gb|EAN98015.1| hypothetical protein, conserved [Trypanosoma cruzi]
- 122 gi|70875864|gb|EAN89373.1| hypothetical protein, conserved [Trypanosoma cruzi]
- 123 gi|70873198|gb|EAN87049.1| vacuolar ATP synthase, putative [Trypanosoma cruzi]
- 124 gi|70884955|gb|EAN97794.1| 40S ribosomal protein S3a, putative [Trypanosoma cruzi]
- 125 gi|70882272|gb|EAN95250.1| hypothetical protein, conserved [Trypanosoma cruzi]
- 126 gi|70877557|gb|EAN90888.1| serine-palmitoyl-CoA transferase, putative [Trypanosoma cruzi]
- 127 gi|70875486|gb|EAN89035.1| ABC transporter, putative [Trypanosoma cruzi]
- 128 gi|70882129|gb|EAN95116.1| UDP-Gal or UDP-GlcNAc-dependent glycosyltransferase, putative [Trypanosoma cruzi]
- 129 gi|70877564|gb|EAN90895.1| V-type ATPase, A subunit, putative [Trypanosoma cruzi]
- 130 gi|70877693|gb|EAN91012.1| prohibitin, putative [Trypanosoma cruzi]
- 131 gi|70885432|gb|EAN98251.1| calpain cysteine peptidase, putative [Trypanosoma cruzi]
- 132 gi|70883132|gb|EAN96060.1| glutamyl carboxypeptidase, putative [Trypanosoma cruzi]
- 133 gi|70887301|gb|EAO00060.1| dispersed gene family protein 1 (DGF-1), putative [Trypanosoma cruzi]
- 134 gi|70870773|gb|EAN85046.1| hypothetical protein, conserved [Trypanosoma cruzi]
- 135 gi|70878818|gb|EAN92041.1| endosomal integral membrane protein, putative [Trypanosoma cruzi]
- 136 gi|3063559|gb|AAC14094.1| TcC31.13 [Trypanosoma cruzi]
- 137 gi|70876574|gb|EAN90012.1| hypothetical protein, conserved [Trypanosoma cruzi]
- 138 gi|70869151|gb|EAN83807.1| multidrug resistance protein E, putative [Trypanosoma cruzi]
- 139 gi|70882035|gb|EAN95027.1| huntingtin interacting protein (HIP), putative [Trypanosoma cruzi]
- 140 gi|70868406|gb|EAN83270.1| hypothetical protein, conserved [Trypanosoma cruzi]
- 141 gi|70871543|gb|EAN85671.1| ribonucleoprotein p18, mitochondrial precursor, putative [Trypanosoma cruzi]
- 142 gi|70879631|gb|EAN92788.1| cytoskeleton-associated protein CAP5.5, putative [Trypanosoma cruzi]
- 143 gi|70868220|gb|EAN83138.1| calpain cysteine peptidase, putative [Trypanosoma cruzi]
- 144 gi|70881371|gb|EAN94405.1| cytochrome c oxidase subunit V, putative [Trypanosoma cruzi]
- 145 gi|70886416|gb|EAN99198.1| hypothetical protein, conserved [Trypanosoma cruzi]
- 146 gi|70875253|gb|EAN88832.1| hypothetical protein, conserved [Trypanosoma cruzi]
- 147 gi|70865129|gb|EAN81419.1| sterol 24-c-methyltransferase, putative [Trypanosoma cruzi]
- 148 gi|70877838|gb|EAN91145.1| hypothetical protein, conserved [Trypanosoma cruzi]
- 149 gi|70877713|gb|EAN91030.1| hypothetical protein, conserved [Trypanosoma cruzi]
- 150 gi|31322788|gb|AAP22091.1| GP63 group I member b protein [Trypanosoma cruzi]
- 151 gi|70879900|gb|EAN93037.1| hypothetical protein, conserved [Trypanosoma cruzi]
- 152 gi|70884268|gb|EAN97136.1| ATP synthase, epsilon chain, putative [Trypanosoma cruzi]
- 153 gi|70870526|gb|EAN84851.1| hypothetical protein, conserved [Trypanosoma cruzi]
- 154 gi|19262944|emb|CAD26835.1| hexokinase [Trypanosoma cruzi]
- 155 gi|70873535|gb|EAN87340.1| RNA-binding protein, putative [Trypanosoma cruzi]
- 156 gi|70871653|gb|EAN85763.1| small GTP-binding protein Rab1, putative [Trypanosoma cruzi]
- 157 gi|61207176|gb|AAX40321.1| actin [Trypanosoma cruzi]
- 158 gi|70866882|gb|EAN82246.1| dispersed gene family protein 1 (DGF-1), putative [Trypanosoma cruzi]
- 159 gi|70884814|gb|EAN97659.1| chaperonin HSP60, mitochondrial precursor [Trypanosoma cruzi]
- 160 gi|70873934|gb|EAN87685.1| mitochondrial oligo\_U binding protein TBRGG1, putative [Trypanosoma cruzi]
- 161 gi|70882248|gb|EAN95227.1| delta-1-pyrroline-5-carboxylate dehydrogenase, putative [Trypanosoma cruzi]
- 162 gi|70873741|gb|EAN87519.1| fructose-bisphosphate aldolase, glycosomal, putative [Trypanosoma cruzi]
- 163 gi|70883261|gb|EAN96183.1| cystathione gamma lyase, putative [Trypanosoma cruzi]
- 164 gi|10613|emb|CAA43297.1| histone H2b [Trypanosoma cruzi]
- 165 gi|70876182|gb|EAN89660.1| vacuolar ATP synthase, putative [Trypanosoma cruzi]
- 166 gi|70886434|gb|EAN99216.1| hypothetical protein, conserved [Trypanosoma cruzi]
- 167 gi|70880417|gb|EAN93516.1| proton motive ATPase, putative [Trypanosoma cruzi]
- 168 gi|70886961|gb|EAN99727.1| cyclophilin A [Trypanosoma cruzi]
- 169 gi|70881483|gb|EAN94510.1| mitochondrial processing peptidase, beta subunit, putative [Trypanosoma cruzi]
- 170 gi|70883936|gb|EAN96820.1| translation elongation factor 1-beta, putative [Trypanosoma cruzi]
- 171 gi|70886993|gb|EAN99758.1| poly(A)-binding protein, putative [Trypanosoma cruzi]
- 172 gi|70883111|gb|EAN96041.1| 40S ribosomal protein S6, putative [Trypanosoma cruzi]
- 173 gi|89888596|gb|ABD78776.1| antigenic lectin-2 [Trypanosoma cruzi]
- 174 gi|70874176|gb|EAN87895.1| hypothetical protein, conserved [Trypanosoma cruzi]
- 175 gi|70881442|gb|EAN94472.1| vesicle-associated membrane protein, putative [Trypanosoma cruzi]
- 176 gi|70882440|gb|EAN95410.1| nucleosome assembly protein, putative [Trypanosoma cruzi]
- 177 gi|70872512|gb|EAN86478.1| membrane-bound acid phosphatase, putative [Trypanosoma cruzi]
- 178 gi|70868349|gb|EAN83231.1| hypothetical protein, conserved [Trypanosoma cruzi]

- 179 gi|70886870|gb|EAN99638.1| COP-coated vesicle membrane protein erv25 precursor, putative [Trypanosoma cruzi]  
180 gi|70873854|gb|EAN87618.1| serine/threonine protein phosphatase, putative [Trypanosoma cruzi]  
181 gi|57232052|gb|AAW47718.1| sterol 14 alpha-demethylase [Trypanosoma cruzi]  
182 gi|70869185|gb|EAN83833.1| hypothetical protein, conserved [Trypanosoma cruzi]  
183 gi|70872118|gb|EAN86150.1| hypothetical protein, conserved [Trypanosoma cruzi]  
184 gi|15076959|gb|AAK82995.1| lanosterol synthase [Trypanosoma cruzi]  
185 gi|70878052|gb|EAN91340.1| hypothetical protein, conserved [Trypanosoma cruzi]  
186 gi|70882140|gb|EAN95126.1| hypothetical protein, conserved [Trypanosoma cruzi]  
187 gi|70879688|gb|EAN92842.1| 60S ribosomal protein L5, putative [Trypanosoma cruzi]  
188 gi|70873213|gb|EAN87063.1| hypothetical protein, conserved [Trypanosoma cruzi]  
189 gi|70881897|gb|EAN94898.1| hypothetical protein, conserved [Trypanosoma cruzi]  
190 gi|70879852|gb|EAN92993.1| ribosomal protein S26, putative [Trypanosoma cruzi]  
191 gi|70885864|gb|EAN98665.1| hypothetical protein, conserved [Trypanosoma cruzi]  
192 gi|70876689|gb|EAN90113.1| mannosyl-oligosaccharide 1,2-alpha-mannosidase IB, putative [Trypanosoma cruzi]  
193 gi|61744171|gb|AAx55669.1| dehydrogenase [Trypanosoma cruzi]  
194 gi|70882046|gb|EAN95037.1| sterol C-24 reductase, putative [Trypanosoma cruzi]  
195 gi|70884702|gb|EAN97551.1| hypothetical protein, conserved [Trypanosoma cruzi]  
196 gi|70887285|gb|EAO00045.1| aconitase, putative [Trypanosoma cruzi]  
197 gi|70884977|gb|EAN97814.1| hypothetical protein, conserved [Trypanosoma cruzi]  
198 gi|33413806|gb|AAN46742.1| methylthioadenosine phosphorylase [Trypanosoma cruzi]  
199 gi|70879183|gb|EAN92377.1| calcium-translocating P-type ATPase, putative [Trypanosoma cruzi]  
200 gi|52424046|gb|AAU47272.1| elongation factor alpha G5 [Trypanosoma cruzi]  
201 gi|70877124|gb|EAN90501.1| fatty acyl CoA synthetase 2, putative [Trypanosoma cruzi]  
202 gi|70885222|gb|EAN98050.1| membrane-bound acid phosphatase 2, putative [Trypanosoma cruzi]  
203 gi|70869759|gb|EAN84262.1| tricarboxylate carrier, putative [Trypanosoma cruzi]  
204 gi|158429625|pdb|2Q2R|B Chain B, Trypanosoma Cruzi Glucokinase In Complex With Beta-D- Glucose And Adp  
205 gi|70871331|gb|EAN85499.1| glutamamyl carboxypeptidase, putative [Trypanosoma cruzi]  
206 gi|70881768|gb|EAN94776.1| leucine-rich repeat protein, putative [Trypanosoma cruzi]  
207 gi|70880701|gb|EAN93781.1| hypothetical protein, conserved [Trypanosoma cruzi]  
208 gi|5931575|dbj|BAA84681.1| succinate dehydrogenase [Trypanosoma cruzi]  
209 gi|70872765|gb|EAN86688.1| oligosaccharyl transferase subunit, putative [Trypanosoma cruzi]  
210 gi|70865693|gb|EAN81636.1| hypothetical protein, conserved [Trypanosoma cruzi]  
211 gi|70871218|gb|EAN85406.1| hypothetical protein, conserved [Trypanosoma cruzi]  
212 gi|70882077|gb|EAN95066.1| hypoxanthine-guanine phosphoribosyltransferase, putative [Trypanosoma cruzi]  
213 gi|577617|gb|AAC37213.1| cysteine proteinase  
214 gi|70882486|gb|EAN95454.1| phospholipid-translocating ATPase, putative [Trypanosoma cruzi]  
215 gi|70885967|gb|EAN98765.1| hypothetical protein, conserved [Trypanosoma cruzi]  
216 gi|70879905|gb|EAN93042.1| heat shock protein 85, putative [Trypanosoma cruzi]  
217 gi|70884769|gb|EAN97616.1| fibrillar, putative [Trypanosoma cruzi]  
218 gi|70885555|gb|EAN98368.1| S-phase kinase-associated protein, putative [Trypanosoma cruzi]  
219 gi|70880008|gb|EAN93136.1| hypothetical protein, conserved [Trypanosoma cruzi]  
220 gi|8101109|gb|AAF72544.1|AF267505\_1 GP63-4 protein [Trypanosoma cruzi]  
221 gi|70882897|gb|EAN95839.1| hypothetical protein, conserved [Trypanosoma cruzi]  
222 gi|4388655|emb|CAA06923.1| peroxiredoxin [Trypanosoma cruzi]  
223 gi|45685733|gb|AAS75599.1| NTPDase-1 [Trypanosoma cruzi]  
224 gi|2961256|gb|AAC05706.1| putative malate dehydrogenase [Trypanosoma cruzi]  
225 gi|70884807|gb|EAN97652.1| hypothetical protein Tc00.1047053507641.250 [Trypanosoma cruzi]  
226 gi|70885906|gb|EAN98706.1| hypothetical protein, conserved [Trypanosoma cruzi]  
227 gi|7109727|gb|AAF36775.1|AF112259\_1 aromatic L-alpha-hydroxyacid dehydrogenase [Trypanosoma cruzi]  
228 gi|70884186|gb|EAN97058.1| hypothetical protein Tc00.1047053510533.150 [Trypanosoma cruzi]  
229 gi|157834543|pdb|2AIM|A Chain A, Cruzain Inhibited With Benzoyl-Arginine-Alanine- Fluoromethylketone  
230 gi|70885123|gb|EAN97954.1| cytochrome b5-like, putative [Trypanosoma cruzi]  
231 gi|70874252|gb|EAN87963.1| cytoskeleton-associated protein CAP5.5, putative [Trypanosoma cruzi]  
232 gi|70886358|gb|EAN99142.1| 60S ribosomal protein L23a, putative [Trypanosoma cruzi]  
233 gi|70882266|gb|EAN95245.1| fatty acyl CoA synthetase, putative [Trypanosoma cruzi]  
234 gi|70879262|gb|EAN92450.1| thiolase protein-like protein, putative [Trypanosoma cruzi]  
235 gi|70872419|gb|EAN86400.1| ferric reductase, putative [Trypanosoma cruzi]  
236 gi|70887190|gb|EAN99951.1| thioredoxin, putative [Trypanosoma cruzi]  
237 gi|70887037|gb|EAN99802.1| hypothetical protein Tc00.1047053508461.84 [Trypanosoma cruzi]  
238 gi|70879790|gb|EAN92938.1| mannosyl-oligosaccharide 1,2-alpha-mannosidase IB, putative [Trypanosoma cruzi]

- 239 gi|70887046|gb|EAN99811.1| hypothetical protein Tc00.1047053508461.142 [Trypanosoma cruzi]  
240 gi|70880634|gb|EAN93719.1| membrane-bound acid phosphatase 2, putative [Trypanosoma cruzi]  
241 gi|70872117|gb|EAN86149.1| hypothetical protein, conserved [Trypanosoma cruzi]  
242 gi|70877932|gb|EAN91229.1| hypothetical protein, conserved [Trypanosoma cruzi]  
243 gi|70879710|gb|EAN92863.1| phosphatidic acid phosphatase protein, putative [Trypanosoma cruzi]  
244 gi|70871842|gb|EAN85920.1| calpain-like cysteine peptidase, putative [Trypanosoma cruzi]  
245 gi|70884267|gb|EAN97135.1| 40S ribosomal protein S14, putative [Trypanosoma cruzi]  
246 gi|12407956|gb|AAG53670.1|AF316150\_1 ribosomal protein L7a-like protein [Trypanosoma cruzi]  
247 gi|70885602|gb|EAN98413.1| hypothetical protein, conserved [Trypanosoma cruzi]  
248 gi|70877469|gb|EAN90809.1| hypothetical protein, conserved [Trypanosoma cruzi]  
249 gi|70886872|gb|EAN99640.1| ATP-dependent DEAD/H RNA helicase, putative [Trypanosoma cruzi]  
250 gi|70876201|gb|EAN89677.1| hypothetical protein, conserved [Trypanosoma cruzi]  
251 gi|70883668|gb|EAN96565.1| 60S ribosomal protein L7, putative [Trypanosoma cruzi]  
252 gi|70884465|gb|EAN97324.1| pyruvate dehydrogenase E1 beta subunit, putative [Trypanosoma cruzi]  
253 gi|70885596|gb|EAN98408.1| amastin, putative [Trypanosoma cruzi]  
254 gi|70885399|gb|EAN98219.1| beta galactofuranosyl glycosyltransferase, putative [Trypanosoma cruzi]  
255 gi|70873320|gb|EAN87155.1| GPR1/FUN34/yaaH family, putative [Trypanosoma cruzi]  
256 gi|70866302|gb|EAN81916.1| ATP synthase, alpha chain, mitochondrial precursor, putative [Trypanosoma cruzi]  
257 gi|70886595|gb|EAN99371.1| hypothetical protein, conserved [Trypanosoma cruzi]  
258 gi|70881304|gb|EAN94343.1| eukaryotic peptide chain release factor subunit 1, putative [Trypanosoma cruzi]  
259 gi|70874895|gb|EAN88524.1| 3-ketoacyl-CoA thiolase, putative [Trypanosoma cruzi]  
260 gi|70869822|gb|EAN84309.1| amastin, putative [Trypanosoma cruzi]  
261 gi|70879767|gb|EAN92916.1| hypothetical protein, conserved [Trypanosoma cruzi]  
262 gi|70884649|gb|EAN97500.1| NADH-cytochrome B5 reductase, putative [Trypanosoma cruzi]  
263 gi|50512701|gb|AAT77681.1| putative surface protein [Trypanosoma cruzi]  
264 gi|124109205|gb|ABM91078.1| thiol transferase Tc52 [Trypanosoma cruzi]  
265 gi|70874733|gb|EAN88381.1| NADH-dependent fumarate reductase, putative [Trypanosoma cruzi]  
266 gi|70876133|gb|EAN89615.1| dispersed gene family protein 1 (DGF-1), putative [Trypanosoma cruzi]  
267 gi|70875860|gb|EAN89370.1| NADH-dependent fumarate reductase, putative [Trypanosoma cruzi]  
268 gi|70879233|gb|EAN92423.1| protein kinase, putative [Trypanosoma cruzi]  
269 gi|70884129|gb|EAN97004.1| glutamate dehydrogenase, putative [Trypanosoma cruzi]  
270 gi|70877737|gb|EAN91053.1| L-threonine 3-dehydrogenase, putative [Trypanosoma cruzi]  
271 gi|70880277|gb|EAN93384.1| hypothetical protein, conserved [Trypanosoma cruzi]  
272 gi|1177696|emb|CAA90898.1| F29 [Trypanosoma cruzi]  
273 gi|70877010|gb|EAN90399.1| hypothetical protein, conserved [Trypanosoma cruzi]  
274 gi|70884484|gb|EAN97342.1| hypothetical protein, conserved [Trypanosoma cruzi]  
275 gi|70870912|gb|EAN85159.1| 60S ribosomal protein L4, putative [Trypanosoma cruzi]  
276 gi|70877012|gb|EAN90401.1| hypothetical protein, conserved [Trypanosoma cruzi]  
277 gi|70876960|gb|EAN90354.1| lysosomal alpha-mannosidase precursor, putative [Trypanosoma cruzi]  
278 gi|70873705|gb|EAN87488.1| hypothetical protein, conserved [Trypanosoma cruzi]  
279 gi|19718723|gb|AAL96371.1|AC116314\_8 Tcc44h21-2.8 [Trypanosoma cruzi]  
280 gi|70873942|gb|EAN87693.1| hypothetical protein Tc00.1047053507927.100 [Trypanosoma cruzi]  
281 gi|70866971|gb|EAN82302.1| receptor-type adenylate cyclase, putative [Trypanosoma cruzi]  
282 gi|70885542|gb|EAN98355.1| hypothetical protein, conserved [Trypanosoma cruzi]  
283 gi|70878179|gb|EAN91456.1| hypothetical protein, conserved [Trypanosoma cruzi]  
284 gi|70877367|gb|EAN90720.1| calreticulin, putative [Trypanosoma cruzi]  
285 gi|70874734|gb|EAN88382.1| NADH-dependent fumarate reductase, putative [Trypanosoma cruzi]  
286 gi|70871675|gb|EAN85782.1| hypothetical protein, conserved [Trypanosoma cruzi]  
287 gi|70881191|gb|EAN94237.1| hypothetical protein, conserved [Trypanosoma cruzi]  
288 gi|50659756|gb|AAT80624.1| heat shock protein 70 [Trypanosoma cruzi]  
289 gi|70876228|gb|EAN89702.1| hypothetical protein Tc00.1047053510087.40 [Trypanosoma cruzi]  
290 gi|70882564|gb|EAN95526.1| rac serine-threonine kinase, putative [Trypanosoma cruzi]  
291 gi|70876183|gb|EAN89661.1| ATP synthase F1 subunit gamma protein, putative [Trypanosoma cruzi]  
292 gi|70869048|gb|EAN83733.1| cysteine peptidase, putative [Trypanosoma cruzi]  
293 gi|70884377|gb|EAN97240.1| heat shock 70 kDa protein, mitochondrial precursor, putative [Trypanosoma cruzi]  
294 gi|70885512|gb|EAN98327.1| cruzipain precursor, putative [Trypanosoma cruzi]  
295 gi|70881620|gb|EAN94637.1| I/6 autoantigen, putative [Trypanosoma cruzi]  
296 gi|70880722|gb|EAN93801.1| hypothetical protein, conserved [Trypanosoma cruzi]  
297 gi|70876359|gb|EAN89821.1| hypothetical protein, conserved [Trypanosoma cruzi]  
298 gi|70886066|gb|EAN98859.1| hypothetical protein, conserved [Trypanosoma cruzi]

- 299 gi|1536839|dbj|BAA13313.1| ribosomal protein L17 [Trypanosoma cruzi]  
300 gi|70883875|gb|EAN96763.1| ABC transporter, putative [Trypanosoma cruzi]  
301 gi|70866842|gb|EAN82224.1| dispersed gene family protein 1 (DGF-1), putative [Trypanosoma cruzi]  
302 gi|70885267|gb|EAN98093.1| hypothetical protein, conserved [Trypanosoma cruzi]  
303 gi|70885675|gb|EAN98484.1| hypothetical protein, conserved [Trypanosoma cruzi]  
304 gi|70874684|gb|EAN88337.1| hypothetical protein, conserved [Trypanosoma cruzi]  
305 gi|58177555|pdb|1XQ7|C Chain C, Cyclophilin From Trypanosoma Cruzi Bound To Cyclosporin A  
306 gi|70885799|gb|EAN98603.1| dispersed gene family protein 1 (DGF-1), putative [Trypanosoma cruzi]  
307 gi|70865499|gb|EAN81547.1| NAD(P)-dependent steroid dehydrogenase protein, putative [Trypanosoma cruzi]  
308 gi|70879269|gb|EAN92456.1| 60S ribosomal protein L6, putative [Trypanosoma cruzi]  
309 gi|70882508|gb|EAN95474.1| ABC transporter, putative [Trypanosoma cruzi]  
310 gi|70871330|gb|EAN85498.1| glutamyl carboxypeptidase, putative [Trypanosoma cruzi]  
311 gi|70878193|gb|EAN91470.1| DREV methyltransferase, putative [Trypanosoma cruzi]  
312 gi|21435929|gb|AAM54029.1|AF515449\_1 NAC alpha [Trypanosoma cruzi]  
313 gi|70882622|gb|EAN95580.1| protein kinase, putative [Trypanosoma cruzi]  
314 gi|70881329|gb|EAN94367.1| hypothetical protein, conserved [Trypanosoma cruzi]  
315 gi|70874396|gb|EAN88087.1| hypothetical protein, conserved [Trypanosoma cruzi]  
316 gi|44490012|gb|AAS47059.1| putative amino acid transporter PAT11 [Trypanosoma cruzi]  
317 gi|70870684|gb|EAN84976.1| hypothetical protein, conserved [Trypanosoma cruzi]  
318 gi|70880103|gb|EAN93225.1| hypothetical protein, conserved [Trypanosoma cruzi]  
319 gi|70875210|gb|EAN88796.1| hypothetical protein, conserved [Trypanosoma cruzi]  
320 gi|70872260|gb|EAN86271.1| 60S ribosomal protein L19, putative [Trypanosoma cruzi]  
321 gi|70875763|gb|EAN89283.1| urocanate hydratase, putative [Trypanosoma cruzi]  
322 gi|70874621|gb|EAN88283.1| hypothetical protein, conserved [Trypanosoma cruzi]  
323 gi|70886707|gb|EAN99480.1| hypothetical protein Tc00.1047053510629.460 [Trypanosoma cruzi]  
324 gi|70866446|gb|EAN81986.1| dispersed gene family protein 1 (DGF-1), putative [Trypanosoma cruzi]  
325 gi|70871170|gb|EAN85366.1| hypothetical protein, conserved [Trypanosoma cruzi]  
326 gi|70870609|gb|EAN84918.1| ATPase alpha subunit, putative [Trypanosoma cruzi]  
327 gi|70883129|gb|EAN96057.1| endosomal integral membrane protein, putative [Trypanosoma cruzi]  
328 gi|70886602|gb|EAN99378.1| 40S ribosomal protein S5, putative [Trypanosoma cruzi]  
329 gi|70886070|gb|EAN98863.1| nucleoside diphosphate kinase, putative [Trypanosoma cruzi]  
330 gi|70878085|gb|EAN91370.1| MCAK-like kinesin, putative [Trypanosoma cruzi]  
331 gi|70877493|gb|EAN90831.1| (H+)-ATPase G subunit, putative [Trypanosoma cruzi]  
332 gi|70870338|gb|EAN84707.1| hypothetical protein, conserved [Trypanosoma cruzi]  
333 gi|70886258|gb|EAN99045.1| cruzipain precursor, putative [Trypanosoma cruzi]  
334 gi|70867170|gb|EAN82432.1| hypothetical protein, conserved [Trypanosoma cruzi]  
335 gi|70886544|gb|EAN99322.1| protein disulfide isomerase, putative [Trypanosoma cruzi]  
336 gi|4809047|gb|AAD30064.1|AF133210\_1 laminin receptor precursor-like protein/ p40 ribosome associated-like protein [Trypanosoma cruzi]  
337 gi|70872727|gb|EAN86654.1| hypothetical protein, conserved [Trypanosoma cruzi]  
338 gi|70887048|gb|EAN99813.1| 3-demethylubiquinone-9 3-methyltransferase, putative [Trypanosoma cruzi]  
339 gi|70887136|gb|EAN99898.1| mitochondrial RNA-binding protein 2, putative [Trypanosoma cruzi]  
340 gi|70883920|gb|EAN96806.1| hypothetical protein, conserved [Trypanosoma cruzi]  
341 gi|70867340|gb|EAN82543.1| hypothetical protein, conserved [Trypanosoma cruzi]  
342 gi|70882744|gb|EAN95694.1| hypothetical protein, conserved [Trypanosoma cruzi]  
343 gi|70872694|gb|EAN86627.1| dispersed gene family protein 1 (DGF-1), putative [Trypanosoma cruzi]  
344 gi|70873045|gb|EAN86921.1| small GTP-binding protein, putative [Trypanosoma cruzi] - SAR1  
345 gi|70874459|gb|EAN88142.1| calpain-like cysteine peptidase, putative [Trypanosoma cruzi]  
346 gi|70881770|gb|EAN94778.1| 2-hydroxy-3-oxopropionate reductase, putative [Trypanosoma cruzi]  
347 gi|70885176|gb|EAN98005.1| procyclic form surface glycoprotein, putative [Trypanosoma cruzi]  
348 gi|70878121|gb|EAN91403.1| hypothetical protein, conserved [Trypanosoma cruzi]  
349 gi|70885610|gb|EAN98421.1| ribosomal protein S6, putative [Trypanosoma cruzi]  
350 gi|70886295|gb|EAN99080.1| hypothetical protein, conserved [Trypanosoma cruzi]  
351 gi|70876801|gb|EAN90214.1| hypothetical protein, conserved [Trypanosoma cruzi]  
352 gi|70870010|gb|EAN84453.1| calpain-like cysteine peptidase, putative [Trypanosoma cruzi]  
353 gi|4895063|gb|AAD32707.1|AF146042\_1 GTP-binding protein [Trypanosoma cruzi] - Rab7  
354 gi|70872638|gb|EAN86582.1| hypothetical protein, conserved [Trypanosoma cruzi]  
355 gi|70879827|gb|EAN92970.1| hexose transporter, putative [Trypanosoma cruzi]  
356 gi|1682979|gb|AH004308.1| tyrosine aminotransferase; TAT [Trypanosoma cruzi]  
357 gi|70873790|gb|EAN87562.1| hypothetical protein, conserved [Trypanosoma cruzi]  
358 gi|2393849|gb|AAB70152.1| proton motive ATPase [Trypanosoma cruzi]

- 359 gi|70886640|gb|EAN99415.1| 40S ribosomal protein S9, putative [Trypanosoma cruzi]  
360 gi|70879689|gb|EAN92843.1| COP-coated vesicle membrane protein gp25L precursor, putative [Trypanosoma cruzi]  
361 gi|70884263|gb|EAN97131.1| cytochrome p450-like protein, putative [Trypanosoma cruzi]  
362 gi|15425828|gb|AAK97605.1| calreticulin protein [Trypanosoma cruzi]  
363 gi|70883402|gb|EAN96316.1| hypothetical protein, conserved [Trypanosoma cruzi]  
364 gi|70883945|gb|EAN96829.1| hypothetical protein, conserved [Trypanosoma cruzi]  
365 gi|70883212|gb|EAN96137.1| hypothetical protein, conserved [Trypanosoma cruzi]  
366 gi|26105963|gb|AAN78341.1| TcC31.19 [Trypanosoma cruzi]  
367 gi|70878211|gb|EAN91487.1| cystathionine beta-synthase, putative [Trypanosoma cruzi]  
368 gi|70874206|gb|EAN87923.1| elongation factor 2, putative [Trypanosoma cruzi]  
369 gi|70880766|gb|EAN93841.1| hypothetical protein, conserved [Trypanosoma cruzi]  
370 gi|70884513|gb|EAN97370.1| isopentenyl-diphosphate delta-isomerase, putative [Trypanosoma cruzi]  
371 gi|70873171|gb|EAN87026.1| hypothetical protein, conserved [Trypanosoma cruzi]  
372 gi|70870298|gb|EAN84676.1| hypothetical protein, conserved [Trypanosoma cruzi]  
373 gi|70883531|gb|EAN96438.1| heat shock protein DnaJ, putative [Trypanosoma cruzi]  
374 gi|70874541|gb|EAN88213.1| hypothetical protein, conserved [Trypanosoma cruzi]  
375 gi|37931575|gb|AAP69224.1| SR RNA-binding protein; TcSR62 [Trypanosoma cruzi]  
376 gi|70878716|gb|EAN91946.1| hypothetical protein, conserved [Trypanosoma cruzi]  
377 gi|70881302|gb|EAN94341.1| hypothetical protein, conserved [Trypanosoma cruzi]  
378 gi|70871349|gb|EAN85514.1| protein kinase, putative [Trypanosoma cruzi]  
379 gi|70886888|gb|EAN99655.1| phosphatidylcholine:ceramide cholinephosphotransferase 2, putative [Trypanosoma cruzi]  
380 gi|70883114|gb|EAN96044.1| dispersed gene family protein 1 (DGF-1), putative [Trypanosoma cruzi]  
381 gi|70881822|gb|EAN94827.1| protein tyrosine phosphatase, putative [Trypanosoma cruzi]  
382 gi|58198651|gb|AAW65974.1| Rab GTPase protein 5 [Trypanosoma cruzi]  
383 gi|70886934|gb|EAN99700.1| hypothetical protein, conserved [Trypanosoma cruzi]  
384 gi|70873617|gb|EAN87410.1| delta-adaptin, putative [Trypanosoma cruzi]  
385 gi|70885496|gb|EAN98311.1| hypothetical protein, conserved [Trypanosoma cruzi]  
386 gi|70879650|gb|EAN92806.1| ATP-dependent zinc metalloproteinase, putative [Trypanosoma cruzi]  
387 gi|70880411|gb|EAN93510.1| 60S ribosomal protein L10, putative [Trypanosoma cruzi]  
388 gi|70872519|gb|EAN86484.1| hypothetical protein, conserved [Trypanosoma cruzi]  
389 gi|70886698|gb|EAN99471.1| dispersed gene family protein 1 (DGF-1), putative [Trypanosoma cruzi]  
390 gi|70885133|gb|EAN97964.1| hypothetical protein, conserved [Trypanosoma cruzi]  
391 gi|70883321|gb|EAN96239.1| dispersed gene family protein 1 (DGF-1), putative [Trypanosoma cruzi]  
392 gi|70883578|gb|EAN96482.1| hypothetical protein, conserved [Trypanosoma cruzi]  
393 gi|70886240|gb|EAN99027.1| alanine aminotransferase, putative [Trypanosoma cruzi]  
394 gi|70871757|gb|EAN85848.1| protein disulfide isomerase, putative [Trypanosoma cruzi]  
395 gi|70885013|gb|EAN97849.1| enolase, putative [Trypanosoma cruzi]  
396 gi|70878722|gb|EAN91952.1| hypothetical protein, conserved [Trypanosoma cruzi]  
397 gi|70885369|gb|EAN98191.1| 40S ribosomal protein S10, putative [Trypanosoma cruzi]  
398 gi|70886848|gb|EAN99616.1| tyrosine aminotransferase, putative [Trypanosoma cruzi]  
399 gi|70887033|gb|EAN99798.1| Gim5A protein, putative [Trypanosoma cruzi]  
400 gi|70877360|gb|EAN90715.1| hypothetical protein, conserved [Trypanosoma cruzi]  
401 gi|70871869|gb|EAN85943.1| syntaxin, putative [Trypanosoma cruzi]  
402 gi|19263260|gb|AAL86599.1|AC114397\_1 Tcc1i14-2.1 [Trypanosoma cruzi]  
403 gi|8468607|gb|AAF75547.1| cruzipain [Trypanosoma cruzi]  
404 gi|70882805|gb|EAN95753.1| hypothetical protein, conserved [Trypanosoma cruzi]  
405 gi|60593585|pdb|1U6F|A Chain A, Nmr Solution Structure Of Tcubp1, A Single Rbd-Unit From Trypanosoma Cruzi  
406 gi|70870091|gb|EAN84515.1| calpain-like cysteine peptidase, putative [Trypanosoma cruzi]  
407 gi|70883249|gb|EAN96171.1| ATP-dependent RNA helicase, putative [Trypanosoma cruzi]  
408 gi|70868395|gb|EAN83261.1| hypothetical protein, conserved [Trypanosoma cruzi]  
409 gi|70882103|gb|EAN95091.1| extracellular receptor, putative [Trypanosoma cruzi]  
410 gi|70868646|gb|EAN83442.1| 2-amino-3-ketobutyrate coenzyme A ligase, putative [Trypanosoma cruzi]  
411 gi|70881607|gb|EAN94625.1| protein kinase, putative [Trypanosoma cruzi]  
412 gi|10676|emb|CAA30335.1| unnamed protein product [Trypanosoma cruzi]  
413 gi|70879201|gb|EAN92394.1| hypothetical protein, conserved [Trypanosoma cruzi]  
414 gi|70874988|gb|EAN88605.1| acetylornithine deacetylase-like, putative [Trypanosoma cruzi]  
415 gi|70876890|gb|EAN90295.1| aldehyde dehydrogenase, putative [Trypanosoma cruzi]  
416 gi|70874862|gb|EAN88495.1| cytochrome P450, putative [Trypanosoma cruzi]  
417 gi|70880744|gb|EAN93820.1| hypothetical protein Tc00.1047053511545.90 [Trypanosoma cruzi]  
418 gi|70881480|gb|EAN94507.1| hypothetical protein, conserved [Trypanosoma cruzi]

- 419 gi|70882514|gb|EAN95480.1| endomembrane protein, putative [Trypanosoma cruzi]  
420 gi|70868943|gb|EAN83656.1| 3,2-trans-enoyl-CoA isomerase, mitochondrial precursor, putative [Trypanosoma cruzi]  
421 gi|70880542|gb|EAN93633.1| hypothetical protein, conserved [Trypanosoma cruzi]  
422 gi|70878529|gb|EAN91777.1| hypothetical protein, conserved [Trypanosoma cruzi]  
423 gi|70877155|gb|EAN90529.1| hypothetical protein, conserved [Trypanosoma cruzi]  
424 gi|70875189|gb|EAN88777.1| cofilin/actin depolymerizing factor, putative [Trypanosoma cruzi]  
425 gi|2239278|gb|AAB62280.1| hydroxymethylglutaryl CoA reductase [Trypanosoma cruzi]  
426 gi|70883499|gb|EAN96408.1| malic enzyme, putative [Trypanosoma cruzi]  
427 gi|70875344|gb|EAN88911.1| retrotransposon hot spot (RHS) protein, putative [Trypanosoma cruzi]  
428 gi|70883239|gb|EAN96162.1| small GTP-binding protein Rab18, putative [Trypanosoma cruzi]  
429 gi|83375604|gb|ABC17646.1| ribosomal protein S4 copy 3 [Trypanosoma cruzi]  
430 gi|70866056|gb|EAN81803.1| 60S ribosomal protein L11, putative [Trypanosoma cruzi]  
431 gi|70883185|gb|EAN96111.1| hypothetical protein, conserved [Trypanosoma cruzi]  
432 gi|70873571|gb|EAN87369.1| MFS transporter, putative [Trypanosoma cruzi]  
433 gi|70884592|gb|EAN97446.1| hypothetical protein, conserved [Trypanosoma cruzi]  
434 gi|70866731|gb|EAN82148.1| procyclic form surface glycoprotein, putative [Trypanosoma cruzi]  
435 gi|70874532|gb|EAN88204.1| aldehyde dehydrogenase, putative [Trypanosoma cruzi]  
436 gi|70872425|gb|EAN86406.1| ferric reductase, putative [Trypanosoma cruzi]  
437 gi|70883338|gb|EAN96255.1| hypothetical protein, conserved [Trypanosoma cruzi]  
438 gi|70875250|gb|EAN88829.1| hydrolase, alpha/beta fold family, putative [Trypanosoma cruzi]  
439 gi|70867918|gb|EAN82927.1| retrotransposon hot spot (RHS) protein, putative [Trypanosoma cruzi]  
440 gi|70880412|gb|EAN93511.1| chaperone DnaJ protein, putative [Trypanosoma cruzi]  
441 gi|70881404|gb|EAN94436.1| ADP-ribosylation factor, putative [Trypanosoma cruzi]  
442 gi|70869775|gb|EAN84275.1| succinate dehydrogenase, putative [Trypanosoma cruzi]  
443 gi|70867403|gb|EAN82583.1| dispersed gene family protein 1 (DGF-1), putative [Trypanosoma cruzi]  
444 gi|70885576|gb|EAN98388.1| hypothetical protein, conserved [Trypanosoma cruzi]  
445 gi|70882088|gb|EAN95077.1| ABC transporter, putative [Trypanosoma cruzi]  
446 gi|70878836|gb|EAN92058.1| ABC transporter, putative [Trypanosoma cruzi]  
447 gi|16225904|gb|AAL16022.1|AF420314\_1 zinc finger protein PDZ5 [Trypanosoma cruzi]  
448 gi|70872347|gb|EAN86342.1| hypothetical protein Tc00.1047053504087.20 [Trypanosoma cruzi]  
449 gi|70881892|gb|EAN94893.1| hypothetical protein Tc00.1047053511821.130 [Trypanosoma cruzi]  
450 gi|70883867|gb|EAN96755.1| hypothetical protein, conserved [Trypanosoma cruzi]  
451 gi|70868315|gb|EAN83209.1| dispersed gene family protein 1 (DGF-1), putative [Trypanosoma cruzi]  
452 gi|70886537|gb|EAN99315.1| cytochrome c oxidase subunit IX, putative [Trypanosoma cruzi]  
453 gi|70874050|gb|EAN87787.1| hypothetical protein, conserved [Trypanosoma cruzi]  
454 gi|70867598|gb|EAN82711.1| hypothetical protein, conserved [Trypanosoma cruzi]  
455 gi|70882944|gb|EAN95883.1| activated protein kinase C receptor, putative [Trypanosoma cruzi]  
456 gi|70885077|gb|EAN97910.1| hypothetical protein Tc00.1047053506825.200 [Trypanosoma cruzi]  
457 gi|70875342|gb|EAN88910.1| hypothetical protein Tc00.1047053506633.109 [Trypanosoma cruzi]  
458 gi|67649663|gb|AA78951.1| alfa-crystallin small heat shock protein [Trypanosoma cruzi]  
459 gi|70878978|gb|EAN92189.1| dispersed gene family protein 1 (DGF-1), putative [Trypanosoma cruzi]  
460 gi|70885149|gb|EAN97979.1| hypothetical protein, conserved [Trypanosoma cruzi]  
461 gi|70877123|gb|EAN90500.1| fatty acyl CoA syntetase 1, putative [Trypanosoma cruzi]  
462 gi|70876714|gb|EAN90136.1| glycerol-3-phosphate dehydrogenase, putative [Trypanosoma cruzi]  
463 gi|70874194|gb|EAN87911.1| elongation factor 2, putative [Trypanosoma cruzi]  
464 gi|70885119|gb|EAN97950.1| amino acid permease/transporter, putative [Trypanosoma cruzi]  
465 gi|70887191|gb|EAN99952.1| hypothetical protein, conserved [Trypanosoma cruzi]  
466 gi|22091470|gb|AAM91818.1| flagellar calcium binding protein 3 [Trypanosoma cruzi]  
467 gi|70877915|gb|EAN91214.1| 10 kDa heat shock protein, putative [Trypanosoma cruzi]  
468 gi|70869447|gb|EAN84022.1| hypothetical protein, conserved [Trypanosoma cruzi]  
469 gi|70884132|gb|EAN97007.1| beta galactofuranosyl glycosyltransferase, putative [Trypanosoma cruzi]  
470 gi|70882372|gb|EAN95345.1| hypothetical protein Tc00.1047053506475.110 [Trypanosoma cruzi]  
471 gi|70880173|gb|EAN93289.1| rac serine-threonine kinase, putative [Trypanosoma cruzi]  
472 gi|70877025|gb|EAN90413.1| ADP,ATP carrier protein 1, mitochondrial precursor, putative [Trypanosoma cruzi]  
473 gi|70885780|gb|EAN98585.1| hypothetical protein, conserved [Trypanosoma cruzi]  
474 gi|70882978|gb|EAN95916.1| t-complex protein 1, delta subunit, putative [Trypanosoma cruzi]  
475 gi|70879921|gb|EAN93056.1| lipase domain protein, putative [Trypanosoma cruzi]  
476 gi|70876686|gb|EAN90110.1| ammonium transporter, putative [Trypanosoma cruzi]  
477 gi|14279702|gb|AAK58697.1|AF274060\_1 casein kinase 1.1 [Trypanosoma cruzi]  
478 gi|70879980|gb|EAN93110.1| acyl carrier protein, mitochondrial precursor, putative [Trypanosoma cruzi]

- 479 gi|70884734|gb|EAN97582.1| hypothetical protein, conserved [Trypanosoma cruzi]  
480 gi|70880301|gb|EAN93407.1| prolyl-tRNA synthetase, putative [Trypanosoma cruzi]  
481 gi|70883608|gb|EAN96509.1| hypothetical protein, conserved [Trypanosoma cruzi]  
482 gi|70879011|gb|EAN92219.1| heat shock protein, putative [Trypanosoma cruzi]  
483 gi|70870799|gb|EAN85068.1| membrane-bound acid phosphatase, putative [Trypanosoma cruzi]  
484 gi|70886546|gb|EAN99324.1| dispersed gene family protein 1 (DGF-1), putative [Trypanosoma cruzi]  
485 gi|70880777|gb|EAN93852.1| reticulon domain protein, putative [Trypanosoma cruzi]  
486 gi|1150650|emb|CAA89197.1| P-glycoprotein [Trypanosoma cruzi]  
487 gi|70877487|gb|EAN90825.1| dispersed gene family protein 1 (DGF-1), putative [Trypanosoma cruzi]  
488 gi|70879699|gb|EAN92853.1| hypothetical protein, conserved [Trypanosoma cruzi]  
489 gi|70874520|gb|EAN88194.1| regulatory subunit of protein kinase A-like protein, putative [Trypanosoma cruzi]  
490 gi|70883192|gb|EAN96118.1| 6-phosphogluconate dehydrogenase, decarboxylating [Trypanosoma cruzi]  
491 gi|19401139|gb|AAL87541.1|AF254412\_1 proton motive P-type ATPase 1 [Trypanosoma cruzi]  
492 gi|70882121|gb|EAN95108.1| ATP-dependent DEAD/H RNA helicase, putative [Trypanosoma cruzi]  
493 gi|70878514|gb|EAN91763.1| hypothetical protein Tc00.1047053506975.70 [Trypanosoma cruzi]  
494 gi|70878990|gb|EAN92200.1| receptor-type adenylate cyclase, putative [Trypanosoma cruzi]  
495 gi|70878791|gb|EAN92016.1| hypothetical protein, conserved [Trypanosoma cruzi]  
496 gi|70882412|gb|EAN95383.1| reiske iron-sulfur protein precursor, putative [Trypanosoma cruzi]  
497 gi|70878534|gb|EAN91782.1| hypothetical protein, conserved [Trypanosoma cruzi]  
498 gi|70867597|gb|EAN82710.1| glutamamyl carboxypeptidase, putative [Trypanosoma cruzi]  
499 gi|453380|gb|AAA21207.1| hexose transporter  
500 gi|70884941|gb|EAN97780.1| 60S ribosomal protein L18a, putative [Trypanosoma cruzi]  
501 gi|70876145|gb|EAN89626.1| hypothetical protein, conserved [Trypanosoma cruzi]  
502 gi|70876223|gb|EAN89698.1| heat shock 70 kDa protein, putative [Trypanosoma cruzi]  
503 gi|70876874|gb|EAN90280.1| dynein heavy chain, cytosolic, putative [Trypanosoma cruzi]  
504 gi|70882852|gb|EAN95796.1| hypothetical protein, conserved [Trypanosoma cruzi]  
505 gi|70886195|gb|EAN98983.1| succinyl-CoA synthetase alpha subunit, putative [Trypanosoma cruzi]  
506 gi|158428657|pdb|2GPC|B Chain B, The Crystal Structure Of The Enzyme Fe-Superoxide Dismutase From Trypanosoma Cruzi  
507 gi|70880626|gb|EAN93711.1| dihydrolipoamide acetyltransferase precursor, putative [Trypanosoma cruzi]  
508 gi|70879270|gb|EAN92457.1| hypothetical protein, conserved [Trypanosoma cruzi]  
509 gi|886414|gb|AAC18895.1| TCJ2 [Trypanosoma cruzi]  
510 gi|13897556|gb|AAK48429.1|AF252544\_1 putative CAAX prenyl protease 1 [Trypanosoma cruzi]  
511 gi|70878944|gb|EAN92158.1| 2-amino-3-ketobutyrate coenzyme A ligase, putative [Trypanosoma cruzi]  
512 gi|70876883|gb|EAN90288.1| hypothetical protein, conserved [Trypanosoma cruzi]  
513 gi|70885256|gb|EAN98083.1| hypothetical protein, conserved [Trypanosoma cruzi]  
514 gi|70878269|gb|EAN91541.1| 25 kDa translation elongation factor 1-beta, putative [Trypanosoma cruzi]  
515 gi|70882479|gb|EAN95447.1| ADP/ATP mitochondrial carrier protein, putative [Trypanosoma cruzi]  
516 gi|70876638|gb|EAN90068.1| UDP-Gal or UDP-GlcNAc-dependent glycosyltransferase, putative [Trypanosoma cruzi]  
517 gi|70877470|gb|EAN90810.1| hypothetical protein, conserved [Trypanosoma cruzi]  
518 gi|70882036|gb|EAN95028.1| UDP-Gal or UDP-GlcNAc-dependent glycosyltransferase, putative [Trypanosoma cruzi]  
519 gi|70872733|gb|EAN86660.1| hypothetical protein, conserved [Trypanosoma cruzi]  
520 gi|70885278|gb|EAN98104.1| hypothetical protein, conserved [Trypanosoma cruzi]  
521 gi|70873021|gb|EAN86903.1| tryparedoxin peroxidase [Trypanosoma cruzi]  
522 gi|70876279|gb|EAN89749.1| p1/s1 nuclease, putative [Trypanosoma cruzi]  
523 gi|70879513|gb|EAN92681.1| dispersed gene family protein 1 (DGF-1), putative [Trypanosoma cruzi]  
524 gi|70882938|gb|EAN95877.1| cytochrome oxidase assembly protein, putative [Trypanosoma cruzi]  
525 gi|70879668|gb|EAN92823.1| ribosomal protein L3, putative [Trypanosoma cruzi]  
526 gi|70877696|gb|EAN91015.1| 2-oxoisovalerate dehydrogenase beta subunit, mitochondrial precursor, putative [Trypanosoma cruzi]  
527 gi|70868865|gb|EAN83600.1| hypothetical protein, conserved [Trypanosoma cruzi]  
528 gi|70877537|gb|EAN90870.1| D-alanyl-glycyl endopeptidase-like protein, putative [Trypanosoma cruzi]  
529 gi|70883046|gb|EAN95980.1| cytochrome c oxidase VII, putative [Trypanosoma cruzi]  
530 gi|70879190|gb|EAN92384.1| ADG1-like protein, putative [Trypanosoma cruzi]  
531 gi|70874786|gb|EAN88427.1| 40S ribosomal protein S33, putative [Trypanosoma cruzi]  
532 gi|7304734|gb|AAF40169.2|AF223386\_1 putative glutathione-s-transferase/glutaredoxin [Trypanosoma cruzi]  
533 gi|70876794|gb|EAN90207.1| FG-GAP repeat protein, putative [Trypanosoma cruzi]  
534 gi|70877690|gb|EAN91009.1| hypothetical protein, conserved [Trypanosoma cruzi]  
535 gi|70887446|gb|EAO00202.1| 6-phospho-1-fructokinase, putative [Trypanosoma cruzi]  
536 gi|70878959|gb|EAN92172.1| mitochondrial processing peptidase alpha subunit, putative [Trypanosoma cruzi]  
537 gi|70884207|gb|EAN97078.1| dispersed gene family protein 1 (DGF-1), putative [Trypanosoma cruzi]  
538 gi|70876741|gb|EAN90161.1| mitochondrial RNA binding protein, putative [Trypanosoma cruzi]

- 539 gi|70884456|gb|EAN97315.1| hypothetical protein, conserved [Trypanosoma cruzi]  
540 gi|70878397|gb|EAN91657.1| surface protease GP63, putative [Trypanosoma cruzi]  
541 gi|70879575|gb|EAN92737.1| hypothetical protein, conserved [Trypanosoma cruzi]  
542 gi|70881229|gb|EAN94273.1| hypothetical protein, conserved [Trypanosoma cruzi]  
543 gi|70886918|gb|EAN99685.1| hypothetical protein, conserved [Trypanosoma cruzi]  
544 gi|70885379|gb|EAN98201.1| ribosomal protein L24, putative [Trypanosoma cruzi]  
545 gi|70868907|gb|EAN83631.1| hypothetical protein, conserved [Trypanosoma cruzi]  
546 gi|70873833|gb|EAN87599.1| hypothetical protein, conserved [Trypanosoma cruzi]  
547 gi|70871977|gb|EAN86033.1| cation transporter, putative [Trypanosoma cruzi]  
548 gi|70880964|gb|EAN94024.1| hypothetical protein, conserved [Trypanosoma cruzi]  
549 gi|70879526|gb|EAN92693.1| hypothetical protein, conserved [Trypanosoma cruzi]  
550 gi|70880609|gb|EAN93696.1| hypothetical protein, conserved [Trypanosoma cruzi]  
551 gi|70880815|gb|EAN93888.1| hypothetical protein, conserved [Trypanosoma cruzi]  
552 gi|70866363|gb|EAN81949.1| procyclic form surface glycoprotein, putative [Trypanosoma cruzi]  
553 gi|70885062|gb|EAN97895.1| hypothetical protein, conserved [Trypanosoma cruzi]  
554 gi|124109209|gb|ABM91080.1| thiol transferase Tc52 [Trypanosoma cruzi]  
555 gi|70867035|gb|EAN82344.1| amino acid permease, putative [Trypanosoma cruzi]  
556 gi|70866533|gb|EAN82034.1| surface glycoprotein, putative [Trypanosoma cruzi]  
557 gi|70875557|gb|EAN89098.1| hypothetical protein, conserved [Trypanosoma cruzi]  
558 gi|70866465|gb|EAN81996.1| hypothetical protein, conserved [Trypanosoma cruzi]  
559 gi|70880087|gb|EAN93210.1| vesicle-associated membrane protein, putative [Trypanosoma cruzi]  
560 gi|70883859|gb|EAN96748.1| ATP-binding cassette protein, putative [Trypanosoma cruzi]  
561 gi|70887268|gb|EAO00028.1| citrate synthase, putative [Trypanosoma cruzi]  
562 gi|70883718|gb|EAN96614.1| phospholipase A2-like protein, putative [Trypanosoma cruzi]  
563 gi|70884993|gb|EAN97830.1| splicing factor 3A, putative [Trypanosoma cruzi]  
564 gi|70872185|gb|EAN86210.1| hypothetical protein, conserved [Trypanosoma cruzi]  
565 gi|70874162|gb|EAN87884.1| ras-related protein rab-2a, putative [Trypanosoma cruzi]  
566 gi|70877917|gb|EAN91216.1| protein disulfide isomerase, putative [Trypanosoma cruzi]  
567 gi|70878536|gb|EAN91784.1| peptidase M20/M25/M40, putative [Trypanosoma cruzi]  
568 gi|70868769|gb|EAN83529.1| hypothetical protein, conserved [Trypanosoma cruzi]  
569 gi|70868677|gb|EAN83466.1| hypothetical protein, conserved [Trypanosoma cruzi]  
570 gi|70882911|gb|EAN95853.1| hypothetical protein, conserved [Trypanosoma cruzi]  
571 gi|70881618|gb|EAN94635.1| centrin, putative [Trypanosoma cruzi]  
572 gi|70872472|gb|EAN86446.1| dispersed gene family protein 1 (DGF-1), putative [Trypanosoma cruzi]  
573 gi|70881525|gb|EAN94549.1| phospholipid-transporting ATPase-like protein, putative [Trypanosoma cruzi]  
574 gi|929907|emb|CAA30150.1| unnamed protein product [Trypanosoma cruzi]  
575 gi|70879258|gb|EAN92446.1| cytochrome c oxidase VIII (COX VIII), putative [Trypanosoma cruzi]  
576 gi|70884401|gb|EAN97263.1| hypothetical protein, conserved [Trypanosoma cruzi]  
577 gi|70885590|gb|EAN98402.1| amastin, putative [Trypanosoma cruzi]  
578 gi|70878393|gb|EAN91653.1| DNAK protein, putative [Trypanosoma cruzi]  
579 gi|70879658|gb|EAN92813.1| ribosomal protein S19, putative [Trypanosoma cruzi]  
580 gi|70868637|gb|EAN83435.1| hypothetical protein, conserved [Trypanosoma cruzi]  
581 gi|70872067|gb|EAN86110.1| rab1 small GTP-binding protein, putative [Trypanosoma cruzi]  
582 gi|70877052|gb|EAN90437.1| glucosamine-6-phosphate isomerase, putative [Trypanosoma cruzi]  
583 gi|951451|gb|AAC18896.1| TCJ3 [Trypanosoma cruzi]  
584 gi|70883884|gb|EAN96772.1| hexose transporter, putative [Trypanosoma cruzi]  
585 gi|70882975|gb|EAN95913.1| 60S ribosomal protein L9, putative [Trypanosoma cruzi]  
586 gi|70873801|gb|EAN87571.1| expression site-associated gene (ESAG-like) protein, putative [Trypanosoma cruzi]  
587 gi|70873886|gb|EAN87643.1| hypothetical protein, conserved [Trypanosoma cruzi]  
588 gi|70883290|gb|EAN96210.1| fatty acid elongase, putative [Trypanosoma cruzi]  
589 gi|70870972|gb|EAN85207.1| hypothetical protein, conserved [Trypanosoma cruzi]  
590 gi|70885582|gb|EAN98394.1| p22 protein precursor, putative [Trypanosoma cruzi]  
591 gi|70877097|gb|EAN90476.1| hypothetical protein, conserved [Trypanosoma cruzi]  
592 gi|2275126|emb|CAA03901.1| kmp-11 [Trypanosoma cruzi]  
593 gi|70874311|gb|EAN88014.1| hypothetical protein, conserved [Trypanosoma cruzi]  
594 gi|70869426|gb|EAN84004.1| chaperonin HSP60/CNP60, putative [Trypanosoma cruzi]  
595 gi|70881732|gb|EAN94742.1| hypothetical protein, conserved [Trypanosoma cruzi]  
596 gi|70876009|gb|EAN89502.1| D-isomer specific 2-hydroxyacid dehydrogenase-protein, putative [Trypanosoma cruzi]  
597 gi|70881464|gb|EAN94492.1| protein tyrosine phosphatase, putative [Trypanosoma cruzi]  
598 gi|70879808|gb|EAN92955.1| peptide methionine sulfoxide reductase, putative [Trypanosoma cruzi]

- 599 gi|70876913|gb|EAN90314.1| hypothetical protein, conserved [Trypanosoma cruzi]  
600 gi|70878757|gb|EAN91984.1| hypothetical protein, conserved [Trypanosoma cruzi]  
601 gi|70876943|gb|EAN90340.1| mannosyl-oligosaccharide 1,2-alpha-mannosidase IB, putative [Trypanosoma cruzi]  
602 gi|70884796|gb|EAN97642.1| kinesin, putative [Trypanosoma cruzi]  
603 gi|70877147|gb|EAN90522.1| hypothetical protein, conserved [Trypanosoma cruzi]  
604 gi|70877162|gb|EAN90536.1| hypothetical protein, conserved [Trypanosoma cruzi]  
605 gi|70876200|gb|EAN89676.1| ABC transporter, putative [Trypanosoma cruzi]  
606 gi|70875993|gb|EAN89487.1| hypothetical protein, conserved [Trypanosoma cruzi]  
607 gi|70874857|gb|EAN88491.1| cytochrome c oxidase subunit 10, putative [Trypanosoma cruzi]  
608 gi|70869616|gb|EAN84150.1| cytochrome c, putative [Trypanosoma cruzi]  
609 gi|70866876|gb|EAN82242.1| co-chaperone GrpE, putative [Trypanosoma cruzi]  
610 gi|70865536|gb|EAN81562.1| hypothetical protein, conserved [Trypanosoma cruzi]  
611 gi|70883526|gb|EAN96434.1| hypothetical protein, conserved [Trypanosoma cruzi]  
612 gi|70885179|gb|EAN98008.1| hypothetical protein, conserved [Trypanosoma cruzi]  
613 gi|70881815|gb|EAN94820.1| hypothetical protein, conserved [Trypanosoma cruzi]  
614 gi|70882880|gb|EAN95823.1| ATP-dependent Clp protease subunit, heat shock protein 78, putative [Trypanosoma cruzi]  
615 gi|70881939|gb|EAN94937.1| hypothetical protein, conserved [Trypanosoma cruzi]  
616 gi|50512996|gb|AAT77755.1| 14-3-3 protein [Trypanosoma cruzi]  
617 gi|70884176|gb|EAN97048.1| mu-adaptin 1, putative [Trypanosoma cruzi]  
618 gi|70871069|gb|EAN85284.1| nucleolar RNA helicase II, putative [Trypanosoma cruzi]  
619 gi|70884092|gb|EAN96969.1| Hsc70-interacting protein, putative [Trypanosoma cruzi]  
620 gi|70865956|gb|EAN81757.1| mitochondrial processing peptidase, beta subunit, putative [Trypanosoma cruzi]  
621 gi|70883384|gb|EAN96299.1| hypothetical protein, conserved [Trypanosoma cruzi]  
622 gi|70875264|gb|EAN88842.1| hypothetical protein, conserved [Trypanosoma cruzi]  
623 gi|70868969|gb|EAN83674.1| dispersed gene family protein 1 (DGF-1), putative [Trypanosoma cruzi]  
624 gi|70882249|gb|EAN95228.1| U2 splicing auxiliary factor, putative [Trypanosoma cruzi]  
625 gi|70887186|gb|EAN99947.1| hypothetical protein, conserved [Trypanosoma cruzi]  
626 gi|70867810|gb|EAN82850.1| calpain-like cysteine peptidase, putative [Trypanosoma cruzi]  
627 gi|70885961|gb|EAN98759.1| hypothetical protein, conserved [Trypanosoma cruzi]  
628 gi|70867986|gb|EAN82973.1| hypothetical protein Tc00.1047053509849.30 [Trypanosoma cruzi]  
629 gi|70886853|gb|EAN99621.1| tyrosine aminotransferase, putative [Trypanosoma cruzi]  
630 gi|70868388|gb|EAN83256.1| hypothetical protein, conserved [Trypanosoma cruzi]  
631 gi|3063546|gb|AAC14082.1| TcC31.26 [Trypanosoma cruzi]  
632 gi|70885466|gb|EAN98283.1| retrotransposon hot spot (RHS) protein, putative [Trypanosoma cruzi]  
633 gi|70883569|gb|EAN96473.1| hypothetical protein, conserved [Trypanosoma cruzi]  
634 gi|70873016|gb|EAN86898.1| nucleosome assembly protein-like protein, putative [Trypanosoma cruzi]  
635 gi|70865045|gb|EAN81391.1| cystathione gamma lyase, putative [Trypanosoma cruzi]  
636 gi|70870797|gb|EAN85066.1| hypothetical protein, conserved [Trypanosoma cruzi]  
637 gi|70870868|gb|EAN85123.1| 40S ribosomal protein S15a, putative [Trypanosoma cruzi]  
638 gi|70877525|gb|EAN90860.1| hypothetical protein, conserved [Trypanosoma cruzi]  
639 gi|70881954|gb|EAN94951.1| hypothetical protein, conserved [Trypanosoma cruzi]  
640 gi|70882655|gb|EAN95611.1| small Rab GTP binding protein, putative [Trypanosoma cruzi] - Rab5  
641 gi|70884472|gb|EAN97330.1| short-chain dehydrogenase, putative [Trypanosoma cruzi]  
642 gi|70884056|gb|EAN96935.1| chloride channel protein, putative [Trypanosoma cruzi]  
643 gi|70874980|gb|EAN88598.1| hypothetical protein, conserved [Trypanosoma cruzi]  
644 gi|61741950|gb|AAx54860.1| dehydrogenase [Trypanosoma cruzi]  
645 gi|70871028|gb|EAN85254.1| hypothetical protein, conserved [Trypanosoma cruzi]  
646 gi|70884478|gb|EAN97336.1| hypothetical protein, conserved [Trypanosoma cruzi]  
647 gi|70871999|gb|EAN86052.1| histone H3, putative [Trypanosoma cruzi]  
648 gi|70874103|gb|EAN87831.1| GPI inositol deacylase precursor, putative [Trypanosoma cruzi]  
649 gi|70870909|gb|EAN85156.1| hypothetical protein, conserved [Trypanosoma cruzi]  
650 gi|70881393|gb|EAN94426.1| hypothetical protein Tc00.1047053510861.110 [Trypanosoma cruzi]  
651 gi|70879531|gb|EAN92698.1| hypothetical protein Tc00.1047053509551.120 [Trypanosoma cruzi]  
652 gi|70884093|gb|EAN96970.1| hypothetical protein, conserved [Trypanosoma cruzi]  
653 gi|70879620|gb|EAN92777.1| mevalonate kinase, putative [Trypanosoma cruzi]  
654 gi|70882981|gb|EAN95919.1| 40S ribosomal protein S23, putative [Trypanosoma cruzi]  
655 gi|70887266|gb|EAO00026.1| elongation factor TU, putative [Trypanosoma cruzi]  
656 gi|70881767|gb|EAN94775.1| hypothetical protein, conserved [Trypanosoma cruzi]  
657 gi|70882049|gb|EAN95040.1| hypothetical protein, conserved [Trypanosoma cruzi]  
658 gi|70883358|gb|EAN96274.1| ADP-ribosylation factor 3, putative [Trypanosoma cruzi]

659 gi|70873742|gb|EAN87520.1| hypothetical protein, conserved [Trypanosoma cruzi]  
660 gi|70885238|gb|EAN98065.1| hypothetical protein, conserved [Trypanosoma cruzi]  
661 gi|70875705|gb|EAN89231.1| tartrate-resistant acid phosphatase type 5 precursor, putative [Trypanosoma cruzi]  
662 gi|70885221|gb|EAN98049.1| short chain 3-hydroxyacyl-coa dehydrogenase, putative [Trypanosoma cruzi]  
663 gi|70867364|gb|EAN82558.1| hypothetical protein, conserved [Trypanosoma cruzi]  
664 gi|70879456|gb|EAN92630.1| ATP synthase, putative [Trypanosoma cruzi]  
665 gi|1911172|emb|CAA72787.1| hypothetical protein [Trypanosoma cruzi]  
666 gi|70876700|gb|EAN90123.1| seryl-tRNA synthetase, putative [Trypanosoma cruzi]  
667 gi|70877568|gb|EAN90899.1| ribosomal protein L21E (60S), putative [Trypanosoma cruzi]  
668 gi|70877207|gb|EAN90578.1| hypothetical protein, conserved [Trypanosoma cruzi]  
669 gi|70883843|gb|EAN96732.1| succinyl-CoA ligase [GDP-forming] beta-chain, putative [Trypanosoma cruzi]  
670 gi|70878196|gb|EAN91472.1| glycerol-3-phosphate dehydrogenase, putative [Trypanosoma cruzi]  
671 gi|70877053|gb|EAN90438.1| hypothetical protein Tc00.1047053511025.60 [Trypanosoma cruzi]  
672 gi|70887480|gb|EAO00236.1| hypothetical protein, conserved [Trypanosoma cruzi]  
673 gi|70884872|gb|EAN97714.1| beta galactofuranosyl glycosyltransferase, putative [Trypanosoma cruzi]  
674 gi|70864976|gb|EAN81369.1| 3-oxo-5-alpha-steroid 4-dehydrogenase, putative [Trypanosoma cruzi]  
675 gi|70883528|gb|EAN96436.1| hypothetical protein, conserved [Trypanosoma cruzi]  
676 gi|70882692|gb|EAN95646.1| hypothetical protein, conserved [Trypanosoma cruzi]  
677 gi|70874002|gb|EAN87743.1| hypothetical protein, conserved [Trypanosoma cruzi]  
678 gi|70880778|gb|EAN93853.1| 70 kDa heat shock protein, putative [Trypanosoma cruzi]  
679 gi|61741952|gb|AA54861.1| dehydrogenase [Trypanosoma cruzi]  
680 gi|70871060|gb|EAN85276.1| hypothetical protein Tc00.1047053510679.40 [Trypanosoma cruzi]  
681 gi|70874031|gb|EAN87769.1| 40S ribosomal protein S11, putative [Trypanosoma cruzi]  
682 gi|53849827|emb|CAF04234.1| glycosomal glyceraldehyde phosphate dehydrogenase [Trypanosoma cruzi marinkellei]  
683 gi|70886953|gb|EAN99719.1| hypothetical protein, conserved [Trypanosoma cruzi]  
684 gi|4165126|gb|AAD08694.1| SERCA-type calcium-ATPase [Trypanosoma cruzi]  
685 gi|70875758|gb|EAN89278.1| hypothetical protein Tc00.1047053504045.50 [Trypanosoma cruzi]  
686 gi|70876272|gb|EAN89743.1| hypothetical protein, conserved [Trypanosoma cruzi]  
687 gi|42540753|gb|AAS19277.1| PRL-1 [Trypanosoma cruzi]  
688 gi|70879188|gb|EAN92382.1| hypothetical protein, conserved [Trypanosoma cruzi]  
689 gi|70885415|gb|EAN98235.1| hypothetical protein, conserved [Trypanosoma cruzi]  
690 gi|70882549|gb|EAN95512.1| hypothetical protein, conserved [Trypanosoma cruzi]  
691 gi|70876518|gb|EAN89960.1| ribose 5-phosphate isomerase, putative [Trypanosoma cruzi]  
692 gi|70871964|gb|EAN86022.1| hypothetical protein, conserved [Trypanosoma cruzi]  
693 gi|70884968|gb|EAN97806.1| dispersed gene family protein 1 (DGF-1), putative [Trypanosoma cruzi]  
694 gi|70866059|gb|EAN81806.1| 60S ribosomal protein L11, putative [Trypanosoma cruzi]  
695 gi|70883233|gb|EAN96156.1| prohibitin, putative [Trypanosoma cruzi]  
696 gi|70884049|gb|EAN96928.1| hypothetical protein, conserved [Trypanosoma cruzi]  
697 gi|70877969|gb|EAN91264.1| aldehyde dehydrogenase, putative [Trypanosoma cruzi]  
698 gi|70883339|gb|EAN96256.1| GTP-binding protein, putative [Trypanosoma cruzi] - Ras2  
699 gi|70887458|gb|EAO00214.1| hypothetical protein, conserved [Trypanosoma cruzi]  
700 gi|70883436|gb|EAN96348.1| hypothetical protein, conserved [Trypanosoma cruzi]  
701 gi|70870407|gb|EAN84761.1| mitochondrial processing peptidase, beta subunit, putative [Trypanosoma cruzi]  
702 gi|70867097|gb|EAN82385.1| cruzipain precursor, putative [Trypanosoma cruzi]  
703 gi|70877727|gb|EAN91043.1| class I nuclease-like protein, putative [Trypanosoma cruzi]  
704 gi|70883534|gb|EAN96441.1| hypothetical protein, conserved [Trypanosoma cruzi]  
705 gi|70878421|gb|EAN91678.1| heterogeneous nuclear ribonucleoprotein H/F, putative [Trypanosoma cruzi]  
706 gi|70878870|gb|EAN92089.1| acetyltransferase-like, putative [Trypanosoma cruzi]  
707 gi|70872476|gb|EAN86449.1| hypothetical protein, conserved [Trypanosoma cruzi]  
708 gi|70872790|gb|EAN86708.1| hypothetical protein, conserved [Trypanosoma cruzi]  
709 gi|70886721|gb|EAN99493.1| ubiquitin hydrolase, putative [Trypanosoma cruzi]

#### Contaminant proteins from sample preparation and cell culture medium

##### Accession number - protein description

- 1 gi|157954061|ref|NP\_001103265.1| alpha-2-macroglobulin [Bos taurus]
- 2 gi|27806815|ref|NP\_776376.1| plasminogen [Bos taurus]
- 3 gi|119908306|ref|XP\_001252031.1| PREDICTED: similar to fibronectin 1 isoform 4 preproprotein [Bos taurus]
- 4 gi|27807363|ref|NP\_777241.1| glycosylphosphatidylinositol specific phospholipase D1 [Bos taurus]
- 5 gi|119915494|ref|XP\_584742.3| PREDICTED: similar to Complement C4-A precursor (Acidic complement C4) [Bos taurus]
- 6 gi|99028969|ref|NP\_001035559.2| complement component 3 [Bos taurus]

- 7 gi|120419464|gb|ABM21551.1| prosaposin [Bos taurus]
- 8 gi|76677897|ref|NP\_001029108.1| complement factor H [Bos taurus]
- 9 gi|160333301|ref|NP\_001103979.1| hemoglobin, gamma 2 [Bos taurus]
- 10 gi|147744568|sp|P13645.4|K1C10\_HUMAN Keratin, type I cytoskeletal 10 (Cytokeratin-10) (CK-10) (Keratin-10) (K10)
- 11 gi|78045497|ref|NP\_001030222.1| vitronectin [Bos taurus]
- 12 gi|30794280|ref|NP\_851335.1| albumin [Bos taurus]
- 13 gi|157428072|ref|NP\_001098944.1| prenylcysteine oxidase 1 [Bos taurus]
- 14 gi|1346343|sp|P04264.5|K2C2\_HUMAN Keratin, type II cytoskeletal 1 (Cytokeratin-1) (CK-1) (Keratin-1) (K1) (67 kDa cytoke-  
ratin) (Hair alpha protein)
- 15 gi|81674721|gb|AAI09864.1| Apolipoprotein D [Bos taurus]
- 16 gi|110331825|gb|ABG67018.1| granulin precursor [Bos taurus]
- 17 gi|74268368|gb|AAI02932.1| Chitinase, acidic [Bos taurus]
- 18 gi|76677514|ref|XP\_593120.2| PREDICTED: similar to C4b-binding protein alpha chain [Bos taurus]
- 19 gi|157742960|gb|AAI53848.1| COL18A1 protein [Bos taurus]
- 20 gi|81175178|sp|P35527.2|K1C9\_HUMAN Keratin, type I cytoskeletal 9 (Cytokeratin-9) (CK-9) (Keratin-9) (K9)
- 21 gi|119915491|ref|XP\_875097.2| PREDICTED: similar to Complement C4-A precursor (Acidic complement C4) [Bos taurus]
- 22 gi|139948632|ref|NP\_001077269.1| immunoglobulin lambda-like polypeptide 1 [Bos taurus]
- 23 gi|27807407|ref|NP\_777217.1| ferritin, light polypeptide [Bos taurus]
- 24 gi|27806743|ref|NP\_776414.1| alpha-1-microglobulin/bikunin [Bos taurus]
- 25 gi|114052595|ref|NP\_001039781.1| galectin 3 binding protein [Bos taurus]
- 26 gi|164450479|ref|NP\_786968.2| kininogen 1 isoform I [Bos taurus]
- 27 gi|151556981|gb|AAI49415.1| SERPIND1 protein [Bos taurus]
- 28 gi|115495873|ref|NP\_001069646.1| complement factor properdin [Bos taurus]
- 29 gi|27807349|ref|NP\_777246.1| complement component 1 inhibitor [Bos taurus]
- 30 gi|146186777|gb|AAI40489.1| ADIPOQ protein [Bos taurus]
- 31 gi|115495283|ref|NP\_001069410.1| cellular repressor of E1A-stimulated genes [Bos taurus]
- 32 gi|115496708|ref|NP\_001069831.1| ubiquitin and ribosomal protein L40 [Bos taurus]
- 33 gi|151553925|gb|AAI49078.1| Keratin 10 (epidermolytic hyperkeratosis; keratosis palmaris et plantaris) [Bos taurus]
- 34 gi|151554383|gb|AAI47882.1| IGHG1 protein [Bos taurus]
- 35 gi|119936473|gb|ABM06133.1| keratin 17 [Bos taurus]
- 36 gi|156120795|ref|NP\_001095544.1| quiescin Q6 sulfhydryl oxidase 1 [Bos taurus]
- 37 gi|122692325|ref|NP\_001073844.1| keratin 10 [Bos taurus]
- 38 gi|119890932|ref|XP\_598260.3| PREDICTED: similar to Laminin beta-1 chain precursor (Laminin B1 chain) [Bos taurus]
- 39 gi|146231704|gb|ABQ12927.1| heat shock 70kDa protein 8 [Bos taurus]
- 40 gi|136429|sp|P00761.1|TRYP\_PIG Trypsin precursor
- 41 gi|41386685|ref|NP\_776621.1| thrombospondin 1 [Bos taurus]
- 42 gi|27805933|ref|NP\_776777.1| insulin-like growth factor 2 receptor [Bos taurus]
- 43 gi|86438072|gb|AAI12658.1| VI1a protein [Bos taurus]
- 44 gi|75812932|ref|NP\_001028790.1| actin, gamma 1 [Bos taurus]
- 45 gi|27806671|ref|NP\_776456.1| cathepsin B [Bos taurus]
- 46 gi|45429979|ref|NP\_991355.1| spleen trypsin inhibitor precursor [Bos taurus]
- 47 gi|156120583|ref|NP\_001095437.1| Arylsulfatase G [Bos taurus]
- 48 gi|114050845|ref|NP\_001039462.1| carboxypeptidase B2 (plasma) [Bos taurus]
- 49 gi|6006425|emb|CAB56829.1| hemoglobin alpha chain [Bos taurus]
- 50 gi|27806395|ref|NP\_776613.1| secreted phosphoprotein 2, 24kDa [Bos taurus]
- 51 gi|119901003|ref|XP\_589483.3| PREDICTED: similar to complement component C5 [Bos taurus]
- 52 gi|119909599|ref|XP\_001256018.1| PREDICTED: similar to MGC127066 protein [Bos taurus]
- 53 gi|74354729|gb|AAI03319.1| DDX5 protein [Bos taurus]
- 54 gi|56710317|ref|NP\_001008663.1| keratin 5 (epidermolysis bullosa simplex, Dowling-Meara/Kobner/Weber-Cockayne types) [Bos taurus]
- 55 gi|13432173|sp|P02533.3|K1C14\_HUMAN Keratin, type I cytoskeletal 14 (Cytokeratin-14) (CK-14) (Keratin-14) (K14)
- 56 gi|61555615|gb|AAI46735.1| vanin 1 precursor [Bos taurus]
- 57 gi|59858433|gb|AAI09051.1| tubulin, alpha 1 [Bos taurus]
- 58 gi|164450481|ref|NP\_001106748.1| kininogen 1 isoform II [Bos taurus]
- 59 gi|61553826|gb|AAI46465.1| alpha-N-acetylgalactosaminidase precursor [Bos taurus]
- 60 gi|27807237|ref|NP\_777109.1| ATP synthase, H+ transporting, mitochondrial F1 complex, alpha subunit [Bos taurus]
- 61 gi|149642955|ref|NP\_001092467.1| serpin peptidase inhibitor, clade A (alpha-1 antiproteinase, antitrypsin), member 10 [Bos taurus]
- 62 gi|11183155|gb|ABH07895.1| integrin beta 1 [Bos taurus]
- 63 gi|41386699|ref|NP\_776769.1| heat shock 70kDa protein 2 [Bos taurus]
- 64 gi|114052731|ref|NP\_001040014.1| tubulin, beta polypeptide [Bos taurus]
- 65 gi|40254806|ref|NP\_776975.1| heat shock 70kDa protein 1A [Bos taurus]
- 66 gi|148356276|ref|NP\_001091855.1| keratin 4 [Bos taurus]

- 67 gi|119889504|ref|XP\_582982.3| PREDICTED: similar to integrin alpha 10 subunit [Bos taurus]  
68 gi|119892108|ref|XP\_001254016.1| PREDICTED: similar to epidermal cytoke­ratin 2 [Bos taurus]  
69 gi|81674113|gb|AAI09552.1| LOC615237 protein [Bos taurus]  
70 gi|47132620|ref|NP\_000414.2| keratin 2 [Homo sapiens]  
71 gi|6006423|emb|CAB56828.1| hemoglobin alpha chain [Bos taurus]  
72 gi|3834649|gb|AAC71039.1| immunoglobulin heavy chain variable region [Bos taurus]  
73 gi|3834655|gb|AAC71042.1| immunoglobulin heavy chain variable region [Bos taurus]  
74 gi|27808640|ref|NP\_776998.1| peptidoglycan recognition protein 1 [Bos taurus]  
75 gi|24496448|gb|AAN60017.1| immunoglobulin M heavy chain secretory form [Bos taurus]  
76 gi|56710319|ref|NP\_001008665.1| platelet coagulation factor XI [Bos taurus]  
77 gi|155372183|ref|NP\_001094702.1| carboxypeptidase N, polypeptide 2, 83kD [Bos taurus]  
78 gi|28189781|dbj|BAC56505.1| similar to ribosomal protein S15a [Bos taurus]  
79 gi|61555331|gb|AAX46697.1| surfactant, pulmonary-associated protein D [Bos taurus]  
80 gi|119928970|ref|XP\_001253680.1| PREDICTED: similar to salivary androgen-binding protein beta subunit [Bos taurus]  
81 gi|109939903|gb|AAI18272.1| RAB2A, member RAS oncogene family [Bos taurus]  
82 gi|146186566|gb|AAI40620.1| APOA1 protein [Bos taurus]  
83 gi|119893109|ref|XP\_584169.3| PREDICTED: similar to von Willebrand factor precursor (vWF) [Bos taurus]  
84 gi|28189581|dbj|BAC56405.1| similar to ferritin H subunit [Bos taurus]  
85 gi|119894520|ref|XP\_591255.3| PREDICTED: similar to cartilage oligomeric matrix protein isoform 1 [Bos taurus]  
86 gi|1699167|gb|AAB37380.1| IgG2a heavy chain constant region [Bos taurus]  
87 gi|143811411|sp|P13647.3|K2C5\_HUMAN Keratin, type II cytoskeletal 5 (Cytoke­ratin-5) (CK-5) (K5) (58 kDa cytoke­ratin)  
88 gi|547754|sp|P35908.1|K22E\_HUMAN Keratin, type II cytoskeletal 2 epidermal (Cytoke­ratin-2e) (K2e) (CK 2e) (keratin-2)  
89 gi|154757493|gb|AAI51719.1| PLG protein [Bos taurus]  
90 gi|114053089|ref|NP\_001039714.1| calmodulin 3 [Bos taurus]  
91 gi|115496454|ref|NP\_001068816.1| keratin 6L [Bos taurus]  
92 gi|116004057|ref|NP\_001070385.1| keratin 75 [Bos taurus]  
93 gi|61553131|gb|AAX46355.1| alpha 2 actin [Bos taurus]  
94 gi|84370091|ref|NP\_001033618.1| coagulation factor XIII, B polypeptide [Bos taurus]  
95 gi|83405800|gb|AAI11118.1| Legumain [Bos taurus]  
96 gi|1419424|emb|CAA67257.1| CCP modules 3-12, with parts of CCP 2 and 13 [Bos taurus]  
97 gi|156121099|ref|NP\_001095696.1| alpha-N-acetylglucosaminidase [Bos taurus]  
98 gi|119936593|gb|ABM06156.1| solute carrier family 25, member A6 [Bos taurus]  
99 gi|1575495|gb|AAC48762.1| IgG3 heavy chain constant region [Bos taurus]  
100 gi|119892108|ref|XP\_001254016.1| PREDICTED: similar to epidermal cytoke­ratin 2 [Bos taurus]  
101 gi|119915840|ref|XP\_588122.3| PREDICTED: similar to coagulation factor XIII, A1 polypeptide [Bos taurus]  
102 gi|148581320|emb|CAN87420.1| unnamed protein product [Bos taurus]  
103 gi|77735360|ref|NP\_001029376.1| tubulin, alpha 1 [Bos taurus]  
104 gi|154425814|gb|AAI51501.1| Unknown (protein for MGC:179498) [Bos taurus]  
105 gi|6224858|gb|AAF05984.1| beta actin [Bos taurus]  
106 gi|119904118|ref|XP\_605012.3| PREDICTED: similar to Chain A, Neutrophil Gelatinase-Associated Lipocalin Is A Novel Bacteriostatic Agent That Interferes With Siderophore- Mediated Iron Acquisition [Bos taurus]  
107 gi|155372035|ref|NP\_001094625.1| nidogen 1 [Bos taurus]  
108 gi|114051361|ref|NP\_001039513.1| selenium binding protein 1 [Bos taurus]  
109 gi|28189681|dbj|BAC56455.1| similar to elongation factor 1 alpha [Bos taurus]  
110 gi|154425704|gb|AAI51547.1| ALB protein [Bos taurus]  
111 gi|92096965|gb|AAI14802.1| Similar to Immunoglobulin lambda-like polypeptide 1 precursor (Immunoglobulin-related 14.1 protein) (Immunoglobulin omega polypeptide) (Lambda 5) (CD179b antigen) [Bos taurus]  
112 gi|78050061|ref|NP\_001030236.1| syntaxin 4 [Bos taurus]  
113 gi|82697317|ref|NP\_001032523.1| CD59 molecule, complement regulatory protein [Bos taurus]  
114 gi|119395750|ref|NP\_006112.3| keratin 1 [Homo sapiens]  
115 gi|157427894|ref|NP\_001098854.1| erythrocyte protein band 4.1-like 4 [Bos taurus]  
116 gi|45429977|ref|NP\_991353.1| staphylococcal nuclease and tudor domain containing 1 [Bos taurus]  
117 gi|119890500|ref|XP\_875648.2| PREDICTED: similar to SFPQ protein [Bos taurus]  
118 gi|110331845|gb|ABG67028.1| inter-alpha (globulin) inhibitor H3 [Bos taurus]  
119 gi|159163172|pdb|1UUA|A Chain A, Solution Structure Of A Truncated Bovine Pancreatic Trypsin Inhibitor, 3-58 Bpti  
120 gi|133778044|gb|AAI18285.2| LOC507464 protein [Bos taurus]  
121 gi|56967054|pdb|1XB2|A Chain A, Crystal Structure Of Bos Taurus Mitochondrial Elongation Factor TuTS COMPLEX  
122 gi|115496418|ref|NP\_001068821.1| inter-alpha (globulin) inhibitor H1 [Bos taurus]  
123 gi|154426172|gb|AAI51431.1| Alpha-2-HS-glycoprotein [Bos taurus]  
124 gi|74267794|gb|AAI02562.1| Inter-alpha (globulin) inhibitor H4 (plasma Kallikrein-sensitive glycoprotein) [Bos taurus]  
125 gi|119926011|ref|XP\_592786.3| PREDICTED: similar to killer cell immunoglobulin-like receptor KIR3DL1 [Bos taurus]  
126 gi|28461205|ref|NP\_786984.1| isocitrate dehydrogenase 2 (NADP+), mitochondrial [Bos taurus]

- 127 gi|74268358|gb|AAI03427.1| Immunoglobulin J chain [Bos taurus]
- 128 gi|119903073|ref|XP\_600662.3| PREDICTED: similar to cyclin M4 [Bos taurus]
- 129 gi|1083099|pir|A38933 vitronectin - bovine (fragment)
- 130 gi|28189352|dbj|BAC56367.1| similar to ferritin H subunit [Bos taurus]
- 131 gi|59803089|sp|P48668.3|K2C6C\_HUMAN Keratin, type II cytoskeletal 6C (Cytokeratin-6C) (CK 6C) (K6c keratin) (Cytokeratin-6E) (CK 6E) (Keratin K6h)
- 132 gi|114051137|ref|NP\_001039677.1| C-type lectin domain family 3, member B [Bos taurus]
- 133 gi|40795765|gb|AAR91598.1| e-cadherin [Bos taurus]
- 134 gi|59858511|gb|AAx09090.1| peroxiredoxin 1 [Bos taurus]
- 135 gi|168804008|ref|NP\_001108328.1| tubulin, alpha, ubiquitous [Bos taurus]
- 136 gi|119916998|ref|XP\_614640.3| PREDICTED: similar to GW182 autoantigen isoform 1 [Bos taurus]
- 137 gi|119894960|ref|XP\_875807.2| PREDICTED: similar to KIAA1086 protein [Bos taurus]
- 138 gi|119908045|ref|XP\_617558.3| PREDICTED: similar to phosphoinositide-3-kinase, class 2, beta polypeptide, partial [Bos taurus]
- 139 gi|95769204|gb|ABF57415.1| serine (or cysteine) proteinase inhibitor, clade A (alpha-1 antiproteinase, antitrypsin), member 1 [Bos taurus]
- 140 gi|27806741|ref|NP\_776417.1| apolipoprotein H [Bos taurus]
- 141 gi|84000027|ref|NP\_001033118.1| TBC1 domain family, member 20 [Bos taurus]
- 142 gi|77736341|ref|NP\_001029870.1| serpin peptidase inhibitor, clade C (antithrombin), member 1 [Bos taurus]
- 143 gi|77735583|ref|NP\_001029487.1| S-adenosylhomocysteine hydrolase [Bos taurus]
- 144 gi|76610659|ref|XP\_611663.2| PREDICTED: similar to APKK229 [Bos taurus]
- 145 gi|153792255|ref|NP\_001093190.1| hypothetical protein LOC615553 [Bos taurus]
- 146 gi|119894726|ref|XP\_606449.3| PREDICTED: similar to Chain A, Structure Of Mammalian C3 With An Intact Thioester At 3a Resolution [Bos taurus]
- 147 gi|83035073|ref|NP\_001032690.1| coiled-coil-helix-coiled-coil-helix domain containing 5 [Bos taurus]
- 148 gi|134085706|ref|NP\_001076979.1| keratin 6A [Bos taurus]
- 149 gi|149642679|ref|NP\_001092350.1| IQ motif containing GTPase activating protein 3 [Bos taurus]
- 150 gi|119891199|ref|XP\_588427.3| PREDICTED: similar to CDC2L5 protein kinase isoform 3 [Bos taurus]
- 151 gi|27806447|ref|NP\_776586.1| prosaposin [Bos taurus]
- 152 gi|162287381|ref|NP\_001104574.1| keratin 73 [Bos taurus]
- 153 gi|119901868|ref|XP\_001252462.1| PREDICTED: similar to arylsulfatase B; ARSB [Bos taurus]
- 154 gi|166064016|ref|NP\_001107044.1| transcription factor IIIA [Bos taurus]
- 155 gi|75832090|ref|NP\_851355.2| isocitrate dehydrogenase 1 (NADP+), soluble [Bos taurus]
- 156 gi|95768253|gb|ABF57341.1| transcription factor 8 (represses interleukin 2 expression) [Bos taurus]
- 157 gi|153791428|ref|NP\_001093194.1| histone H4-like [Bos taurus]
- 158 gi|28373366|pdb|1ITO|A Chain A, Crystal Structure Analysis Of Bovine Spleen Cathepsin B- E64c Complex
- 159 gi|119896242|ref|XP\_618533.3| PREDICTED: similar to myosin tail domain-containing protein [Bos taurus]
- 160 gi|119895088|ref|XP\_606561.3| PREDICTED: similar to chondroitin sulfate synthase 3 [Bos taurus]
