# Supplementary material
Source: PubMed Central journal article supplement (PMC2763633)
Supplement: NIHMS108584-supplement-Suppl__Table_2.pdf [file NIHMS108584-supplement-Suppl__Table_2.pdf]

|                                                                                  | PCF (Spectrum count) | Reservosome fraction (# unique peptides) |       |      |
|----------------------------------------------------------------------------------|----------------------|------------------------------------------|-------|------|
|                                                                                  |                      | B1TU                                     | B1MTU | B1TG |
| <b>Vertommen et al - mitochondrial proteins</b>                                  |                      |                                          |       |      |
| 2-Oxoglutarate dehydrogenase E1 component                                        | 60                   | 0                                        | 0     | 0    |
| l-Threonine 3-dehydrogenase                                                      | 42                   | 1                                        | 1     | 1    |
| 2-Oxoglutarate dehydrogenase subunit                                             | 37                   | 0                                        | 0     | 0    |
| 2-Amino-3-ketobutyrate coenzyme A ligase                                         | 35                   | 0                                        | 1     | 0    |
| delta-1-pyrroline-5-carboxylate dehydrogenase                                    | 34                   | 2                                        | 2     | 2    |
| 2-Oxoglutarate dehydrogenase, E2 component, dihydrolipoamide succinyltransferase | 16                   | 0                                        | 0     | 0    |
| ATP synthase beta chain, mitochondrial precursor                                 | 10                   | 0                                        | 0     | 0    |
| Dihydrolipoyl dehydrogenase                                                      | 16                   | 0                                        | 0     | 0    |
| Glutamate dehydrogenase                                                          | 16                   | 7                                        | 9     | 2    |
| Mitochondrial processing peptidase, beta subunit                                 | 14                   | 2                                        | 7     | 0    |
| <b>Vertommen et al - glycosomal proteins</b>                                     |                      |                                          |       |      |
| fructose-bisphosphate aldolase                                                   | 438                  | 2                                        | 2     | 0    |
| glyceraldehyde 3-phosphate dehydrogenase                                         | 530                  | 0                                        | 0     | 0    |
| hexokinase                                                                       | 305                  | 2                                        | 3     | 0    |
| phosphofructokinase                                                              | 249                  | 0                                        | 0     | 0    |
| glycerol-3-phosphate dehydrogenase                                               | 241                  | 0                                        | 1     | 0    |
| glycerol kinase                                                                  | 196                  | 0                                        | 0     | 0    |
| glucose-6-phosphate isomerase                                                    | 122                  | 0                                        | 0     | 0    |
| Hypoxanthine-guanine phosphoribosyltransferase                                   | 85                   | 2                                        | 2     | 1    |
| Glycosomal phosphoenolpyruvate carboxykinase                                     | 57                   | 0                                        | 0     | 0    |
| Arginine kinase                                                                  | 54                   | 0                                        | 0     | 0    |
| Triosephosphate isomerase                                                        | 34                   | 0                                        | 0     | 0    |
| <b>Colasante et al - glycosomal proteins</b>                                     |                      |                                          |       |      |
| pyruvate phosphate dikinase                                                      | 73                   | 14                                       | 23    | 2    |
| phosphoenolpyruvate carboxykinase                                                | 73                   | 9                                        | 9     | 4    |
| glycerol-3-phosphate dehydrogenase                                               | 66                   | 0                                        | 1     | 0    |
| glycerol kinase                                                                  | 64                   | 0                                        | 0     | 0    |
| glycosomal malate dehydrogenase                                                  | 57                   | 0                                        | 0     | 0    |
| fructose-bisphosphate aldolase                                                   | 53                   | 2                                        | 2     | 0    |
| glyceraldehyde 3-phosphate dehydrogenase                                         | 55                   | 0                                        | 0     | 0    |
| triosephosphate isomerase                                                        | 50                   | 0                                        | 0     | 0    |
| TIM, triosephosphate isomerase                                                   | 50                   | 0                                        | 0     | 0    |
| beta tubulin                                                                     | 46                   | 18                                       | 0     | 8    |
| <b>Broadhead et al - flagellar proteins</b>                                      |                      |                                          |       |      |
| paraflagellar rod component                                                      | 38                   | 0                                        | 0     | 0    |
| flagellar radial spoke component                                                 | 20                   | 0                                        | 0     | 0    |
| dynein heavy chain                                                               | 50                   | 1                                        | 0     | 0    |
| microtubule-associated protein                                                   | 10                   | 0                                        | 0     | 0    |
| paraflagellar rod protein 1                                                      | 43                   | 0                                        | 0     | 0    |
| paraflagellar rod protein 2                                                      | 58                   | 0                                        | 0     | 0    |
| paraflagellar rod component PAR4                                                 | 33                   | 0                                        | 0     | 0    |
| dynein arm light chain                                                           | 24                   | 0                                        | 0     | 0    |
| flagellar radial spoke component                                                 | 20                   | 0                                        | 0     | 0    |
| adenylate kinase                                                                 | 17                   | 0                                        | 0     | 0    |
